# Supplementary material for: Potassium–telluroether interactions: structural characterisation and computational analysis
Source: Royal Society of Chemistry journal article supplement (doi:10.1039/d4cc06539e), 2025-01-01
Supplement: d4cc06539e2.pdf [file d4cc06539e2.pdf]

## Supporting Information

# Potassium–Telluroether Interactions: Structural Characterisation and Computational Analysis

Novan A. G. Gray,<sup>a</sup> James F. Britten<sup>b</sup> and David J. H. Emslie\*<sup>a</sup>

<sup>a</sup> Department of Chemistry & Chemical Biology, McMaster University, 1280 Main Street West, Hamilton, Ontario, L8S 4M1, Canada

<sup>b</sup> McMaster Analytical X-ray Diffraction Facility, McMaster University, Hamilton, Ontario, L8S 4M1, Canada

### Table of Contents

|                                                                                                                                             |         |
|---------------------------------------------------------------------------------------------------------------------------------------------|---------|
| General Details.....                                                                                                                        | S2–S3   |
| Synthesis of <b>3-Te</b> , <b>4-Te</b> , <b>5-Te</b> , <b>3-Se</b> and <b>4-Se</b> .....                                                    | S3–S6   |
| X-ray Structure of <b>2-Se</b> ·hexane.....                                                                                                 | S7      |
| <sup>1</sup> H, <sup>13</sup> C{ <sup>1</sup> H}, <sup>77</sup> Se{ <sup>1</sup> H} and <sup>125</sup> Te{ <sup>1</sup> H} NMR Spectra..... | S8–S24  |
| Computational Data for <b>2-Te*</b> and <b>3-Se*</b> .....                                                                                  | S25–S27 |
| SHAPE Parameters for <b>2-Te</b> , <b>2-Se</b> , <b>3-Se</b> and <b>5-Te</b> .....                                                          | S28–S29 |
| References.....                                                                                                                             | S30     |

**General Details.** An argon-filled MBraun UNILab glove box equipped with a  $-30\text{ }^{\circ}\text{C}$  freezer was employed for the manipulation and storage of all oxygen- and moisture- sensitive compounds. Air-sensitive reactions were performed on a double-manifold high-vacuum line equipped with an Edwards RV 12 vacuum pump using standard techniques.  $\text{H}[\text{ASe}_2^{\text{Tripp}2}]$ ,  $\text{KCH}_2\text{Ph}$ ,<sup>1</sup>  $\text{H}[\text{ATe}_2^{\text{Tripp}2}]$ ,  $[\text{K}(\text{ASe}_2^{\text{Tripp}2})(\text{dme})_2]$  (**1-Se**) and  $[\text{K}(\text{ATe}_2^{\text{Tripp}2})(\text{dme})_2]$  (**1-Te**) were synthesized following previously reported procedure.<sup>2</sup> Benzene and pentane were purchased from Sigma Aldrich. Hexanes, toluene and THF were purchased from Caledon, *o*-difluorobenzene was purchased from Oakwood, and deuterated solvents were purchased from Cambridge Isotope Laboratories, Inc.

Hexanes, pentane, THF, and toluene were initially dried and distilled at atmospheric pressure from sodium/benzophenone (Hexanes and THF) and sodium (toluene). *o*-difluorobenzene and benzene were dried by stirring over 4 Å molecular sieves for 1 week, degassing, and distilling under reduced pressure. All solvents were stored over an appropriate drying agent (THF, toluene, benzene, THF-*d*<sub>8</sub>, C<sub>6</sub>D<sub>6</sub> = Na/Ph<sub>2</sub>CO; hexanes, pentane = Na/Ph<sub>2</sub>CO/tetraglyme) and introduced to reactions or air-free solvent storage flasks via vacuum transfer with condensation at  $-78\text{ }^{\circ}\text{C}$  or inside of an argon-filled glovebox. Argon gas was purchased from Air Liquide.

<sup>1</sup>H, <sup>13</sup>C{<sup>1</sup>H}, <sup>77</sup>Se{<sup>1</sup>H}, and <sup>125</sup>Te{<sup>1</sup>H} NMR spectra of all air-sensitive samples were acquired at room temperature in J-Young tubes on either a Bruker AV-600 or AV-500 MHz spectrometer. <sup>1</sup>H and <sup>13</sup>C{<sup>1</sup>H} spectra were referenced relative to the residual protio signals of the solvent (C<sub>6</sub>D<sub>6</sub>) or the solvent carbon resonances, respectively (C<sub>6</sub>D<sub>6</sub>: <sup>1</sup>H = 7.16 ppm; <sup>13</sup>C = 128.06 ppm). <sup>77</sup>Se{<sup>1</sup>H}, and <sup>125</sup>Te{<sup>1</sup>H} spectra were referenced by indirect referencing from a <sup>1</sup>H NMR spectrum.<sup>3</sup> Peak assignments in the spectra of all new compounds were made with the aid of DEPT-q, COSY, HSQC, and HMBC experiments. All <sup>13</sup>C{<sup>1</sup>H} signals are singlets unless otherwise specified.

X-ray crystallographic analyses were performed with suitable crystals coated in paratone oil on a Bruker Dual Source D8 Venture diffractometer using the I $\mu$ S 3.0 Mo source at 70 W with a HELIOS Mo focusing optic (ELM33) in the McMaster Analytical X-ray (MAX) Diffraction Facility. Raw data was processed using XPREP (as part of the APEX v4 software) and solved by intrinsic (SHELXT)<sup>4</sup> methods. Structure refinement was performed with

SHELXL<sup>5</sup> in OLEX2.<sup>6</sup> Images were rendered using Ortep3 and POV-Ray. Combustion elemental analyses were carried out at McMaster University.

**DFT Details.** Geometry optimization calculations were conducted with ADF within the AMS DFT package (SCM, version 2022.103 or 2023.102).<sup>7</sup> Calculations were performed in the gas phase within the generalized gradient approximation using the 1996 Perdew–Burke–Ernzerhof exchange and correlation functional (PBE),<sup>8</sup> using the scalar zeroth-order regular approximation (ZORA)<sup>9-13</sup> for relativistic effects, and Grimme’s DFT-D3-BJ dispersion correction.<sup>14,15</sup> These calculations were conducted using all-electron triple- $\zeta$  basis sets with two polarization functions (TZ2P), and fine integration grids (Becke<sup>16,17</sup> very good quality) with default convergence criteria for energy and gradients. Analytical frequency calculations<sup>18-20</sup> were performed to ensure that each geometry optimization led to an energy minimum. Quantum theory of atoms in molecules (QTAIM)<sup>21</sup> properties were obtained using the QTAIM keyword<sup>7</sup> with an analysis level of Full,<sup>22-29</sup> and NBO<sup>30</sup> analysis was carried out using NBO 6.0 within the AMS DFT package. DFT, NBO and QTAIM data for **1-Te\*** has been published elsewhere.<sup>2</sup>

Potassium 4,5-bis(2,4,6-triisopropylphenyltellurido)-2,7,9,9-tetramethylacridanide · 2 THF

[K(ATe<sub>2</sub><sup>Tripp2</sup>)(THF)<sub>2</sub>] (**3-Te**)

**Method A:** H[ATe<sub>2</sub><sup>Tripp2</sup>] (42.5 mg, 0.0474 mmol) and KCH<sub>2</sub>Ph (7.4 mg, 0.057 mmol) was dissolved in ~2 ml of THF in a pre-weighed 25 ml round-bottom flask and stirred under argon for 15 minutes, the solution was then evaporated to dryness *in vacuo* and dried for 10 minutes leaving an orange residue. 50.8 mg (0.0471 mmol) of [K(ATe<sub>2</sub><sup>Tripp2</sup>)(THF)<sub>2</sub>] (**3-Te**) was obtained in nearly quantitative yield (99 %).

**Method B:** [K(ATe<sub>2</sub><sup>Tripp2</sup>)(dme)<sub>2</sub>] (**1-Te**) (42.9 mg, 0.0385 mmol) was dissolved in ~4 ml of THF and then subsequently dried *in vacuo* to yield an orange residue. The material was redissolved in ~4 ml of THF and evaporated to dryness, and then once more for a total of three cycles of dissolutions and evaporations. The residue was dried for 10 minutes then brought into a glovebox and collected. 30.5 mg (0.0283 mmol) of [K(ATe<sub>2</sub><sup>Tripp2</sup>)(THF)<sub>2</sub>] (**3-Te**) was obtained as a yellow solid in 73 % yield. <sup>1</sup>H NMR (C<sub>6</sub>D<sub>6</sub>, 600 MHz):  $\delta$  7.34 (s, 4H, ArCH), 7.04 (s, 2H, AcridanCH), 6.67 (s, 2H, AcridanCH), 4.18-4.12 (sept,  $J_{H-H}$  6.83 Hz, 4H, *o*-CHMe<sub>2</sub>), 3.56-3.54 (m, 8H, OCH<sub>2</sub>), 2.93-2.87 (sept,  $J_{H-H}$  6.95 Hz, 2H, *p*-CHMe<sub>2</sub>), 2.07 (s, 6H, CMe), 1.70 (s, 6H, CMe<sub>2</sub>), 1.42-1.40

(m, 8H, CH<sub>2</sub>), 1.38-1.37 (d, *J*<sub>H-H</sub> 6.88 Hz, 24H, *p*-CHMe<sub>2</sub>), 1.29-1.28 (d, *J*<sub>H-H</sub> 6.98 Hz, 12H, *o*-CHMe<sub>2</sub>). <sup>13</sup>C{<sup>1</sup>H} NMR (C<sub>6</sub>D<sub>6</sub>, 150 MHz): δ 156.14 (*o*-ArylC), 150.29 (*p*-ArylC), 147.15 (AcridanCMe), 129.86 (AcridanCH), ~128 (AcridanC), 125.58 (AcridanCH), 125.36 (AcridanCTe), 122.50 (ArylCTe), 121.59 (ArylCH), 112.04 (AcridanCN), 67.83 (OCH<sub>2</sub>), 40.05 (*o*-CHMe<sub>2</sub>), 37.06 (CMe<sub>2</sub>), 35.68 (CMe<sub>2</sub>), 34.68 (*p*-CHMe<sub>2</sub>), 25.81 (CH<sub>2</sub>), 25.41 (*o*-CHMe<sub>2</sub>), 24.30 (*p*-CHMe<sub>2</sub>), 21.06 (CMe). <sup>125</sup>Te{<sup>1</sup>H} NMR (C<sub>6</sub>D<sub>6</sub>, 189 MHz): δ 231.57 (s). **Anal. Calcd. for Method B.** C<sub>55</sub>H<sub>78</sub>NTe<sub>2</sub>O<sub>2</sub>K: C, 61.19; H, 7.28; N, 1.30%. **Found:** C, 61.20; H, 7.39; N 1.37%.

Potassium 4,5-bis(2,4,6-triisopropylphenyltellurido)-2,7,9,9-tetramethylacridanide · THF

[K(ATe<sub>2</sub><sup>Tripp2</sup>)(THF)] (4-Te)

[K(ATe<sub>2</sub><sup>Tripp2</sup>)(THF)<sub>2</sub>] (3-Te) (50.8 mg, 0.0471 mmol) was charged to a 25 ml round bottom flask and dried *in vacuo* for 60 minutes. The solid was collected in the glovebox and 24.1 mg (0.0239 mmol) of a yellow [K(ATe<sub>2</sub><sup>Tripp2</sup>)(THF)] (4-Te) was obtained in 51% yield. <sup>1</sup>H NMR (C<sub>6</sub>D<sub>6</sub>, 600 MHz): δ 7.34 (s, 4H, ArCH), 7.04 (s, 2H, AcridanCH), 6.67 (s, 2H, AcridanCH), 4.18-4.12 (sept, *J*<sub>H-H</sub> 6.83 Hz, 4H, *o*-CHMe<sub>2</sub>), 3.55-3.53 (m, 4H, OCH<sub>2</sub>), 2.92-2.86 (sept, *J*<sub>H-H</sub> 6.95 Hz, 2H, *p*-CHMe<sub>2</sub>), 2.07 (s, 6H, CMe), 1.70 (s, 6H, CMe<sub>2</sub>), 1.42-1.40 (m, 4H, CH<sub>2</sub>), 1.38-1.37 (d, *J*<sub>H-H</sub> 6.88 Hz, 24H, *p*-CHMe<sub>2</sub>), 1.29-1.28 (d, *J*<sub>H-H</sub> 6.98 Hz, 12H, *o*-CHMe<sub>2</sub>). <sup>13</sup>C{<sup>1</sup>H} NMR (C<sub>6</sub>D<sub>6</sub>, 150 MHz): δ 156.14 (*o*-ArylC), 150.30 (*p*-ArylC), 147.14 (AcridanCMe), 129.87 (AcridanCH), ~128 (AcridanC), 125.59 (AcridanCH), 125.38 (AcridanCTe), 122.49 (ArylCTe), 121.60 (ArylCH), 112.04 (AcridanCN), 67.83 (OCH<sub>2</sub>), 40.05 (*o*-CHMe<sub>2</sub>), 37.06 (CMe<sub>2</sub>), 35.71 (CMe<sub>2</sub>), 34.68 (*p*-CHMe<sub>2</sub>), 25.80 (CH<sub>2</sub>), 25.41 (*o*-CHMe<sub>2</sub>), 24.30 (*p*-CHMe<sub>2</sub>), 21.06 (CMe). <sup>125</sup>Te{<sup>1</sup>H} NMR (C<sub>6</sub>D<sub>6</sub>, 189 MHz): δ 231.57 (s). **Anal. Calcd.** C<sub>51</sub>H<sub>70</sub>NTe<sub>2</sub>OK: C, 60.80; H, 7.00; N, 1.39%. **Found:** C, 60.28; H, 6.51; N 1.46%.

Potassium 4,5-bis(2,4,6-triisopropylphenyltellurido)-2,7,9,9-tetramethylacridanide [K(ATe<sub>2</sub><sup>Tripp2</sup>)]<sub>x</sub>

(5-Te)

[K(ATe<sub>2</sub><sup>Tripp2</sup>)(THF)] (4-Te) (19.0 mg, 0.0189 mmol) was dissolved in ~1 ml of benzene and then evaporated *in vacuo* to yield an orange residue. The material was then redissolved in ~1 ml of benzene and once again evaporated to dryness. The solid was dried for 2 hours then brought

into a glovebox and collected. 12.4 mg (0.0133 mmol) of  $[\text{K}(\text{ATe}_2^{\text{Tripp}2})]_x$  (**5-Te**) was collected as an orange solid in 70 % yield. X-ray quality crystals of **5-Te** were grown from *o*-difluorobenzene/pentane solution of **4-Te** cooled to  $-30\text{ }^\circ\text{C}$  over 1 month.  $^1\text{H NMR}$  ( $\text{C}_6\text{D}_6$ , 600 MHz):  $\delta$  7.34 (s, 4H, ArCH), 7.04 (s, 2H, AcridanCH), 6.67 (s, 2H, AcridanCH), 4.18-4.12 (sept,  $J_{\text{H-H}}$  6.89 Hz, 4H, *o*-CHMe<sub>2</sub>), 2.93-2.86 (sept,  $J_{\text{H-H}}$  6.92 Hz, 2H, *p*-CHMe<sub>2</sub>), 2.07 (s, 6H, CMe), 1.70 (s, 6H, CMe<sub>2</sub>), 1.38-1.37 (d,  $J_{\text{H-H}}$  6.20 Hz, 24H, *p*-CHMe<sub>2</sub>), 1.29-1.28 (d,  $J_{\text{H-H}}$  6.93 Hz, 12H, *o*-CHMe<sub>2</sub>).  $^{13}\text{C}\{^1\text{H}\}$  NMR ( $\text{C}_6\text{D}_6$ , 150 MHz):  $\delta$  156.15 (*o*-ArylC), 150.30 (*p*-ArylC), 147.14 (AcridanCMe), 129.89 (AcridanCH), ~128 (AcridanC), 125.61 (AcridanCH), 125.42 (AcridanCTe), 122.48 (ArylCTe), 121.60 (ArylCH), 112.02 (AcridanCN), 40.06 (*o*-CHMe<sub>2</sub>), 37.06 (CMe<sub>2</sub>), 35.68 (CMe<sub>2</sub>), 34.68 (*p*-CHMe<sub>2</sub>), 25.42 (*o*-CHMe<sub>2</sub>), 24.30 (*p*-CHMe<sub>2</sub>), 21.06 (CMe).  $^{125}\text{Te}\{^1\text{H}\}$  NMR ( $\text{C}_6\text{D}_6$ , 189 MHz):  $\delta$  231.17 (s). **Anal. Calcd.** C<sub>47</sub>H<sub>62</sub>NTe<sub>2</sub>K: C, 60.36; H, 6.68; N, 1.50%. **Found:** C, 60.74; H, 6.70; N 1.54%.

Potassium 4,5-bis(2,4,6-triisopropylphenylselenido)-2,7,9,9-tetramethylacridanide · 2 THF

$[\text{K}(\text{ASe}_2^{\text{Tripp}2})(\text{THF})_2]$  (**3-Se**)

$\text{H}[\text{ASe}_2^{\text{Tripp}2}]$  (28.6 mg, 0.0358 mmol) and  $\text{KCH}_2\text{Ph}$  (5.1 mg, 0.039 mmol) was dissolved in ~3 ml THF and stirred under argon for 15 minutes, the solution was then evaporated to dryness *in vacuo* and dried for 10 minutes leaving a yellow residue. The solid was collected in the glovebox and 12 mg (0.012 mmol) of a compound of  $[\text{K}(\text{ASe}_2^{\text{Tripp}2})(\text{THF})_2]$  (**3-Se**) was obtained in 34% yield. X-ray quality crystals of **3-Se** (intergrown with **2-Se·hexane**) and **2-Se** (intergrown with **3-Se**) were grown from THF/hexanes solution of **1-Se** cooled to  $-30\text{ }^\circ\text{C}$  over 2 days.  $^1\text{H NMR}$  ( $\text{C}_6\text{D}_6$ , 600 MHz):  $\delta$  7.32 (s, 4H, ArCH), 7.08 (s, 2H, AcridanCH), 6.42 (s, 2H, AcridanCH), 3.98-3.93 (sept,  $J_{\text{H-H}}$  6.87 Hz, 4H, *o*-CHMe<sub>2</sub>), 3.54-3.52 (m, 8H, OCH<sub>2</sub>), 2.90-2.83 (sept,  $J_{\text{H-H}}$  6.95 Hz, 2H, *p*-CHMe<sub>2</sub>), 2.11 (s, 6H, CMe), 1.76 (s, 6H, CMe<sub>2</sub>), 1.41-1.39 (m, 8H, CH<sub>2</sub>), 1.30-1.29 (d,  $J_{\text{H-H}}$  6.71 Hz, 24H, *o*-CHMe<sub>2</sub>), 1.27-1.26 (d,  $J_{\text{H-H}}$  6.88 Hz, 12H, *p*-CHMe<sub>2</sub>).  $^{13}\text{C}\{^1\text{H}\}$  NMR ( $\text{C}_6\text{D}_6$ , 150 MHz):  $\delta$  154.27 (*o*-ArylC), 150.20 (*p*-ArylC), 146.12 (AcridanCSe), ~128 (AcridanC), ~128 (ArylCSe), ~128 (AcridanC), 124.87 (AcridanCH), 124.40 (AcridanCH), 123.34 (AcridanCMe), 122.23 (AcridanCN), 122.23 (ArylCH), 67.83 (OCH<sub>2</sub>), 37.35 (CMe<sub>2</sub>), 34.73 (*p*-CHMe<sub>2</sub>), 34.71 (*o*-CHMe<sub>2</sub>), 34.18 (CMe<sub>2</sub>), 25.78 (CH<sub>2</sub>), 24.92 (*o*-CHMe<sub>2</sub>), 24.23 (*p*-CHMe<sub>2</sub>), 21.32 (CMe).  $^{77}\text{Se}\{^1\text{H}\}$  NMR ( $\text{C}_6\text{D}_6$ , 114 MHz):  $\delta$  202.40 (s). **Anal. Calcd.** C<sub>55</sub>H<sub>78</sub>NSe<sub>2</sub>O<sub>2</sub>K: C, 67.25; H, 8.00; N, 1.43%. **Found:** C, 67.90; H, 7.86; N 1.81%.

Potassium 4,5-bis(2,4,6-triisopropylphenylselenido)-2,7,9,9-tetramethylacridanide · THF

[K(AsE<sub>2</sub><sup>Tripp<sub>2</sub></sup>)(THF)] (4-Se)

[K(AsE<sub>2</sub><sup>Tripp<sub>2</sub></sup>)(THF)<sub>2</sub>] (**3-Se**) (6 mg, 0.061 mmol) was dried *in vacuo* in a pre-weighed flask on a vacuum line for 1 hour. The flask was brought back into the glovebox and 5.6 mg (0.061 mmol) of [K(AsE<sub>2</sub><sup>Tripp<sub>2</sub></sup>)(THF)] (**4-Se**) was obtained in quantitative yield. <sup>1</sup>H NMR (C<sub>6</sub>D<sub>6</sub>, 600 MHz): δ 7.32 (s, 4H, ArCH), 7.08 (s, 2H, AcridanCH), 6.43 (s, 2H, AcridanCH), 3.96-3.91 (sept, *J*<sub>H-H</sub> 7.00 Hz, 4H, *o*-CHMe<sub>2</sub>), 3.57-3.55 (m, 4H, OCH<sub>2</sub>), 2.90-2.83 (sept, *J*<sub>H-H</sub> 7.12 Hz, 2H, *p*-CHMe<sub>2</sub>), 2.11 (s, 6H, CMe), 1.77 (s, 6H, CMe<sub>2</sub>), 1.42-1.40 (m, 4H, CH<sub>2</sub>), 1.30-1.29 (d, *J*<sub>H-H</sub> 6.71 Hz, 24H, *o*-CHMe<sub>2</sub>), 1.27-1.26 (d, *J*<sub>H-H</sub> 6.88 Hz, 12H, *p*-CHMe<sub>2</sub>). <sup>13</sup>C{<sup>1</sup>H} NMR (C<sub>6</sub>D<sub>6</sub>, 150 MHz): δ 154.24 (*o*-ArylC), 150.22 (*p*-ArylC), 146.13 (AcridanCSe), ~128 (AcridanC), ~128 (ArylCSe), 124.89 (AcridanCH), 124.42 (AcridanCH), 123.37 (AcridanCMe), 122.24 (AcridanCN), 122.24 (ArylCH), 67.83 (OCH<sub>2</sub>), 37.35 (CMe<sub>2</sub>), 34.73 (*p*-CHMe<sub>2</sub>), 34.71 (*o*-CHMe<sub>2</sub>), 34.61 (CMe<sub>2</sub>), 25.80 (CH<sub>2</sub>), 24.92 (*o*-CHMe<sub>2</sub>), 24.23 (*p*-CHMe<sub>2</sub>), 21.31 (CMe). <sup>77</sup>Se{<sup>1</sup>H} NMR (C<sub>6</sub>D<sub>6</sub>, 114 MHz): δ 202.13 (s). **Anal. Calcd.** C<sub>51</sub>H<sub>70</sub>NSe<sub>2</sub>OK: C, 67.30; H, 7.75; N, 1.54%. **Found:** C, 67.72; H, 7.60; N 1.82%.

# X-ray Crystal Structure of [K(ASe<sub>2</sub><sup>Tripp2</sup>)(THF)<sub>3</sub>]·hexane (2-Se·hexane)

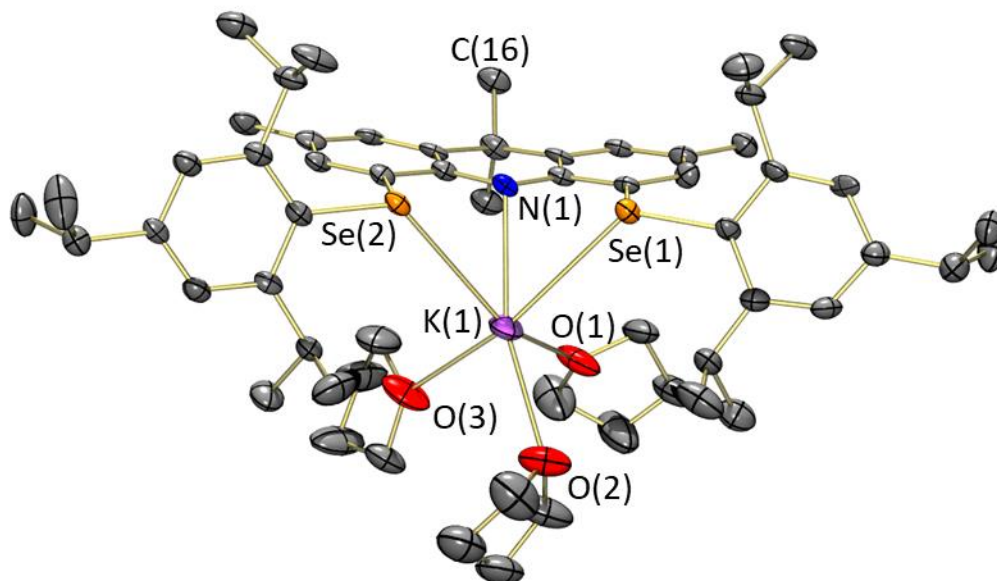

**Figure S1.** X-ray crystal structure of [K(ASe<sub>2</sub><sup>Tripp2</sup>)(THF)<sub>3</sub>]·hexane (**2-Se·hexane**) (**2-Se·hexane**; with diffuse scattering along the *c*-axis suggesting intergrowth of **2-Se·hexane** {major} with **3-Se** {minor}). H atoms and hexane solvent molecule are omitted for clarity. Ellipsoids are drawn at 50% probability.

# NMR Spectroscopy

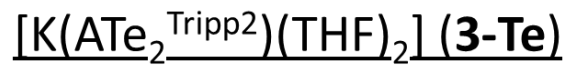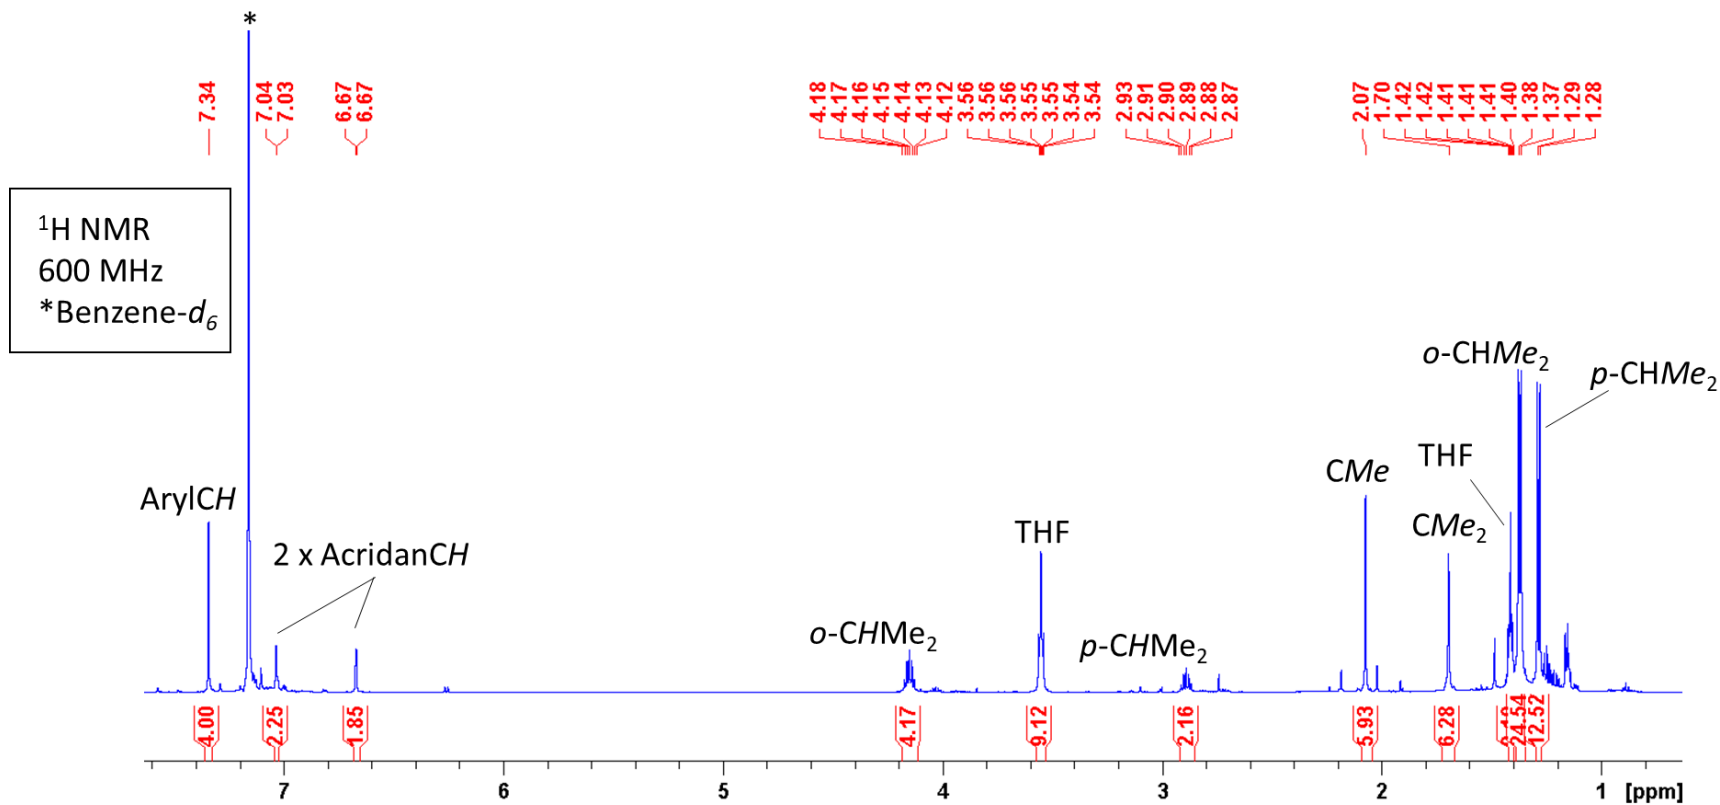

Figure S2.  $^1H$  NMR spectrum of  $[K(ATe_2^{Tripp2})(THF)_2] (3-Te)$  in  $C_6D_6$  (298 K).



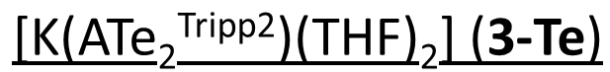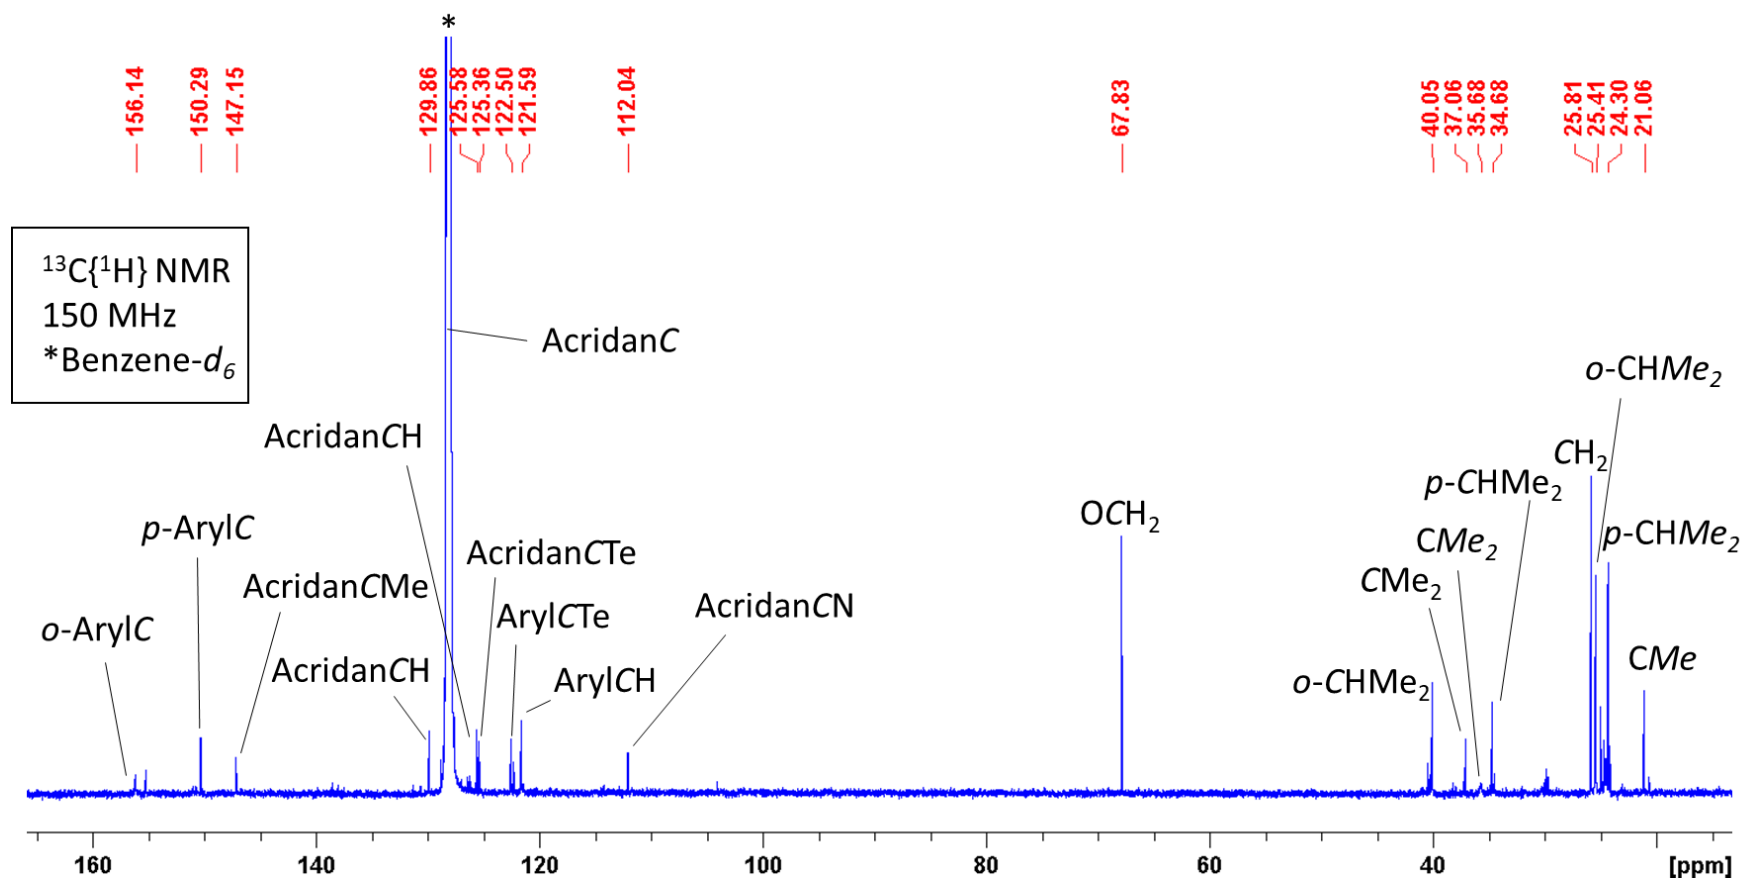

**Figure S3.**  $^{13}C\{^1H\}$  NMR spectrum of  $[K(ATe_2^{Tripp2})(THF)_2] (3-Te)$  in  $C_6D_6$  (298 K).

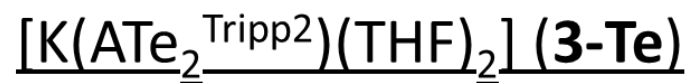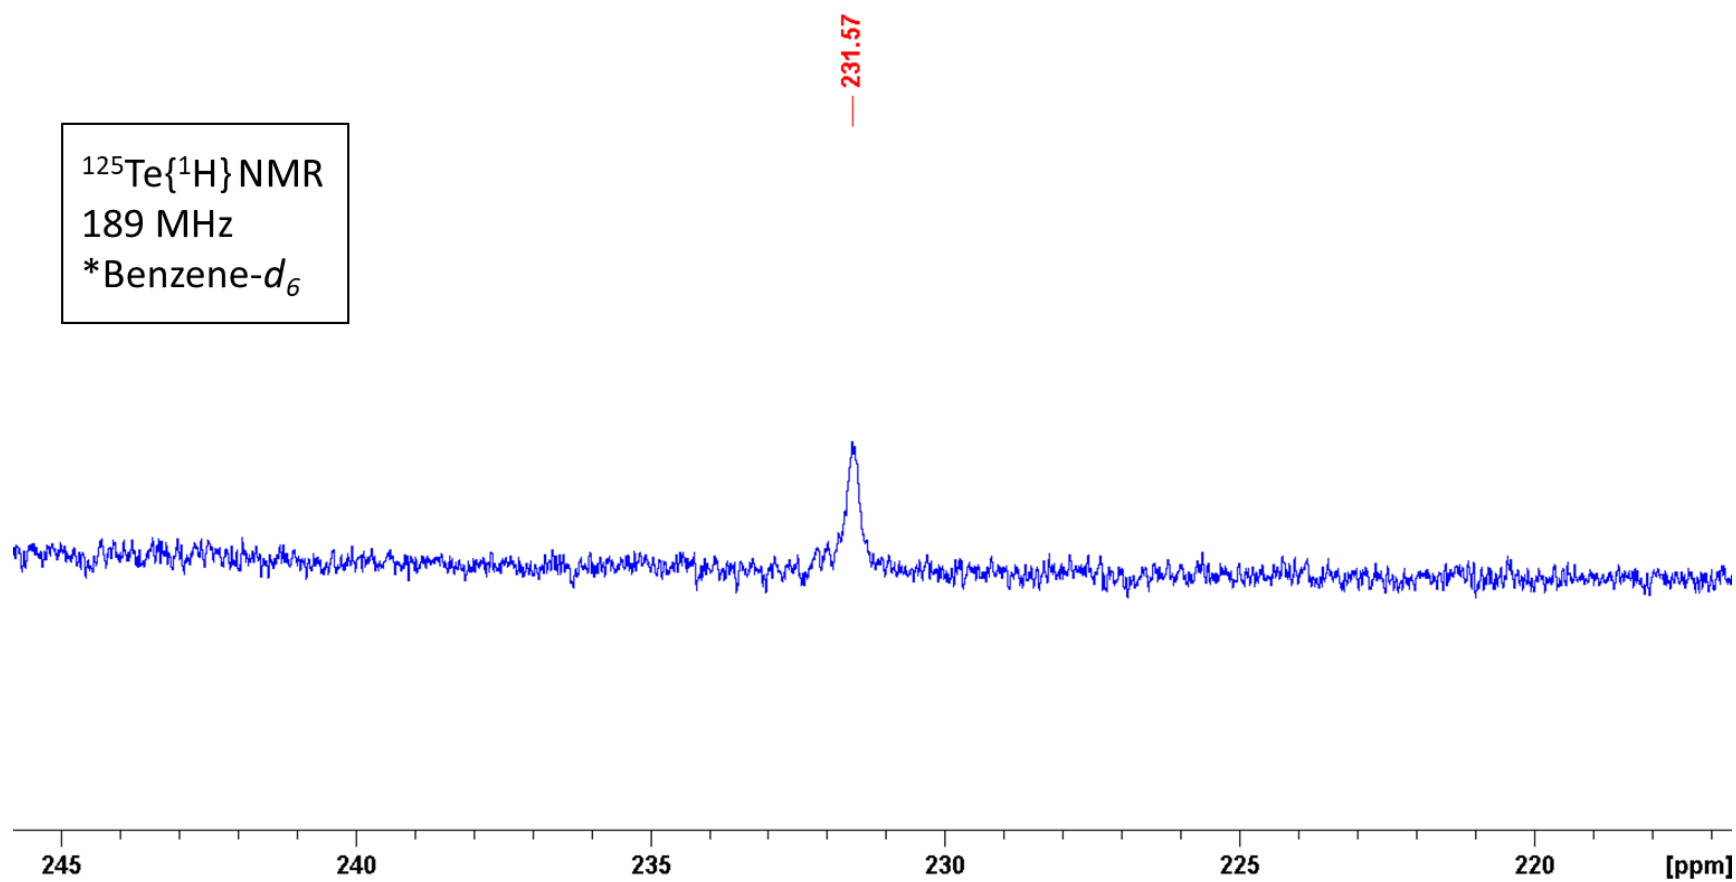

**Figure S4.**  $^{125}\text{Te}\{^1\text{H}\}$  NMR spectrum of [K(ATe<sub>2</sub><sup>Tripp2</sup>)(THF)<sub>2</sub>] (**3-Te**) in C<sub>6</sub>D<sub>6</sub> (298 K).

[K(ATe<sub>2</sub><sup>Tripp2</sup>)(THF)] (4-Te)

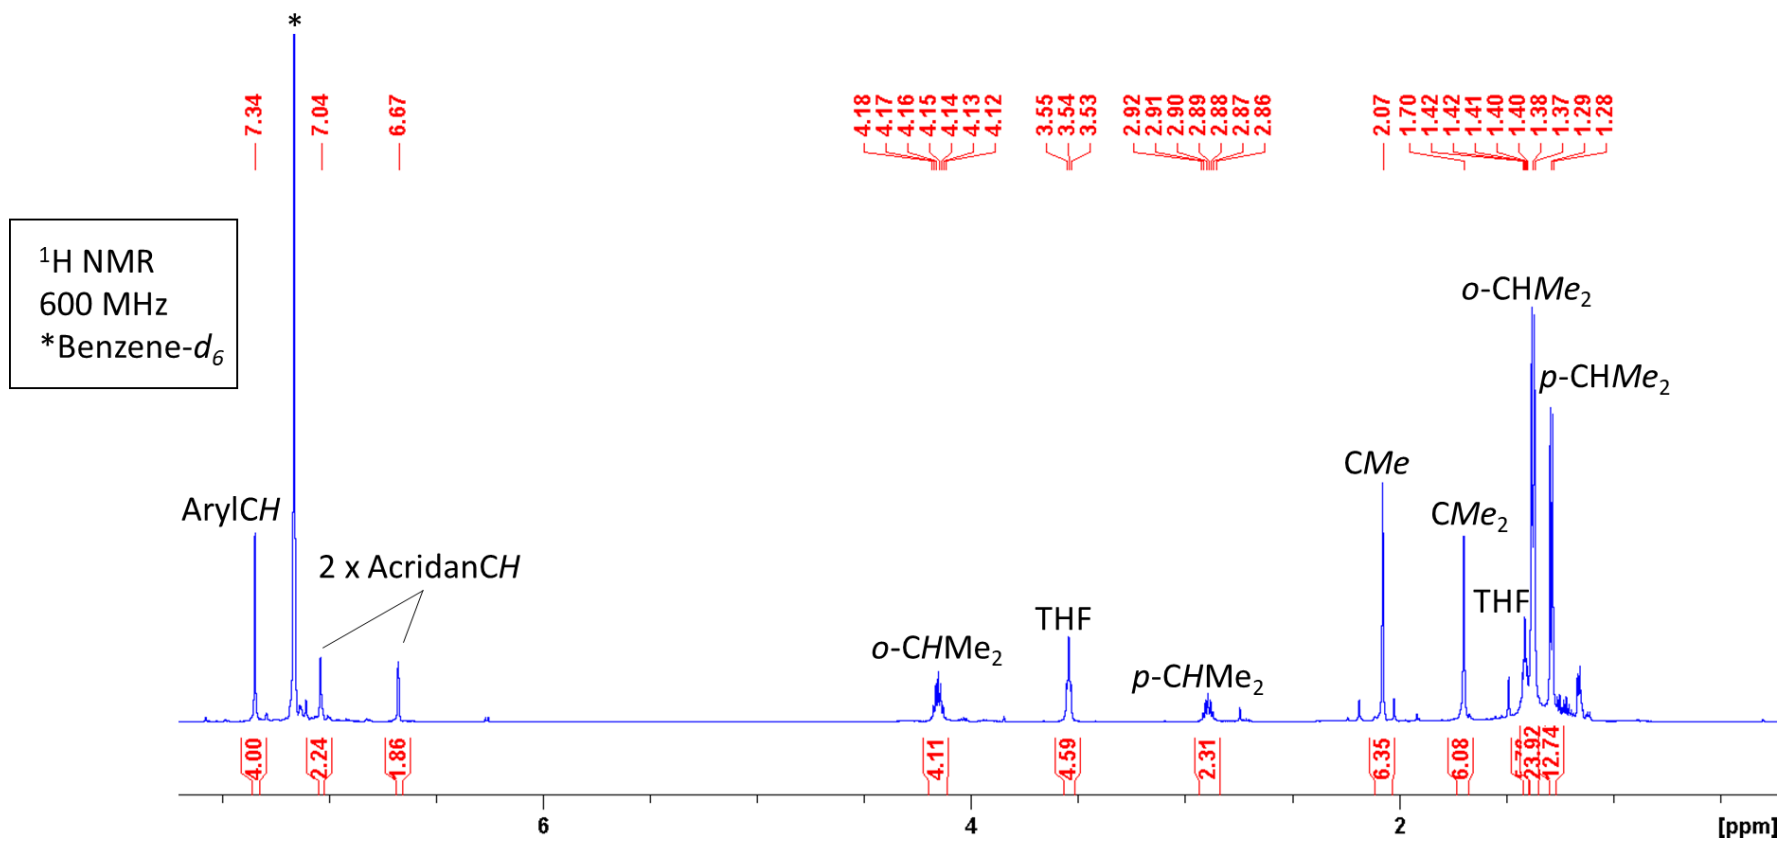

Figure S5. <sup>1</sup>H NMR spectrum of [K(ATe<sub>2</sub><sup>Tripp2</sup>)(THF)] (4-Te) in C<sub>6</sub>D<sub>6</sub> (298 K).

[K(ATe<sub>2</sub><sup>Tripp2</sup>)(THF)] (4-Te)

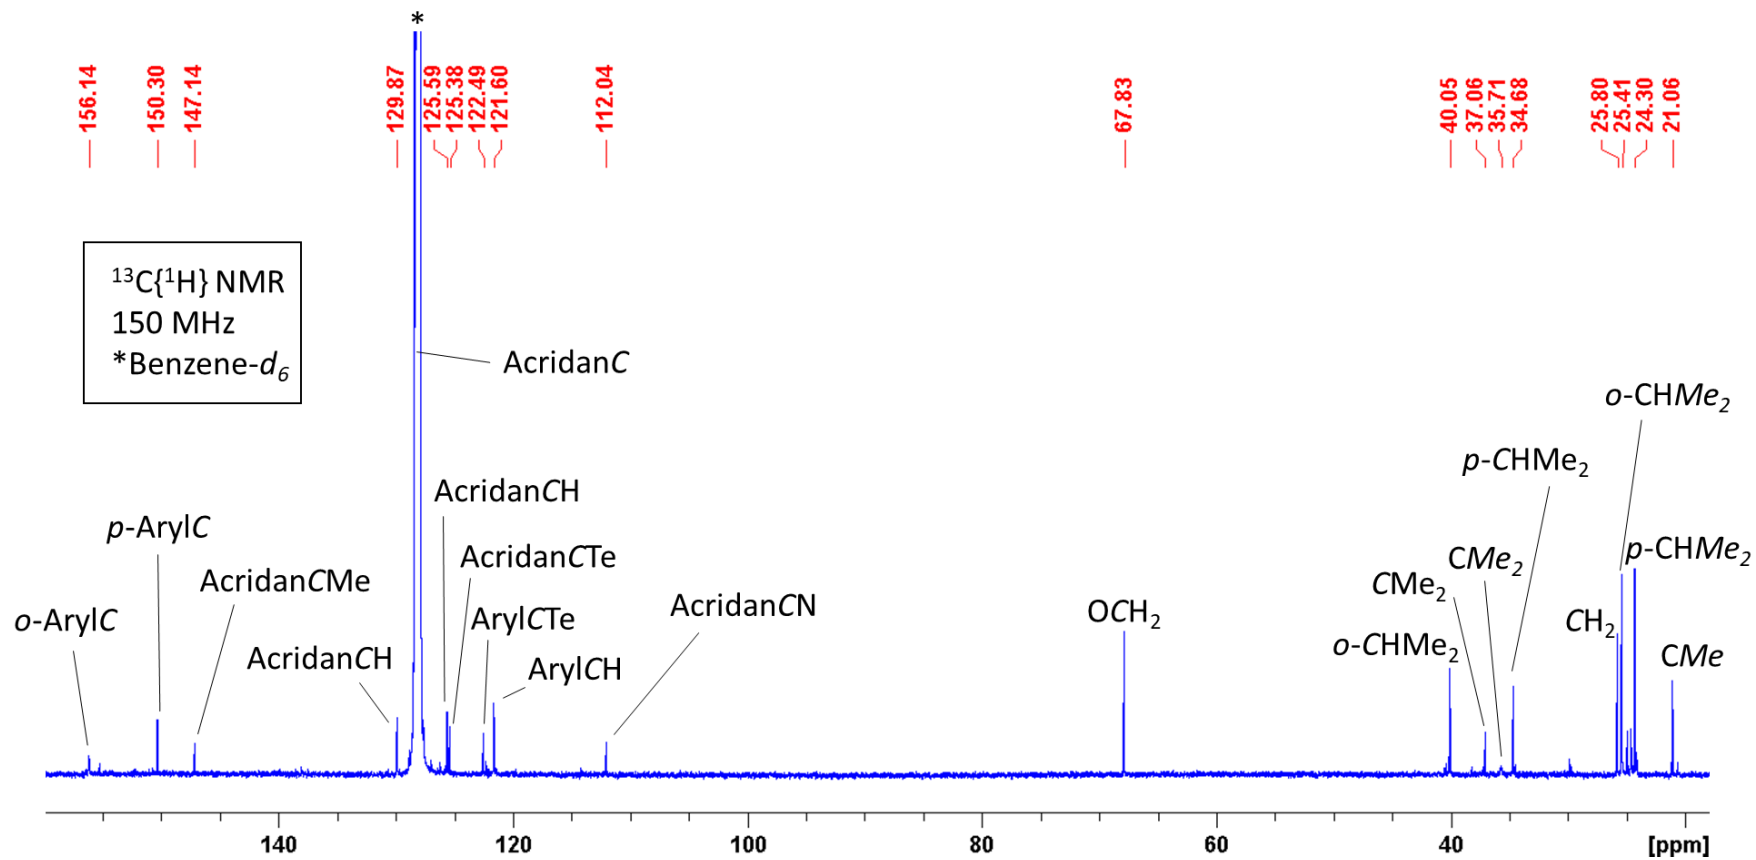

Figure S6. <sup>13</sup>C{<sup>1</sup>H} NMR spectrum of [K(ATe<sub>2</sub><sup>Tripp2</sup>)(THF)] (4-Te) in C<sub>6</sub>D<sub>6</sub> (298 K).

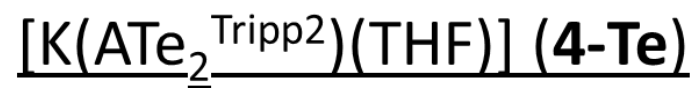

— 231.57

$^{125}\text{Te}\{^1\text{H}\}$  NMR  
189 MHz  
\*Benzene- $d_6$

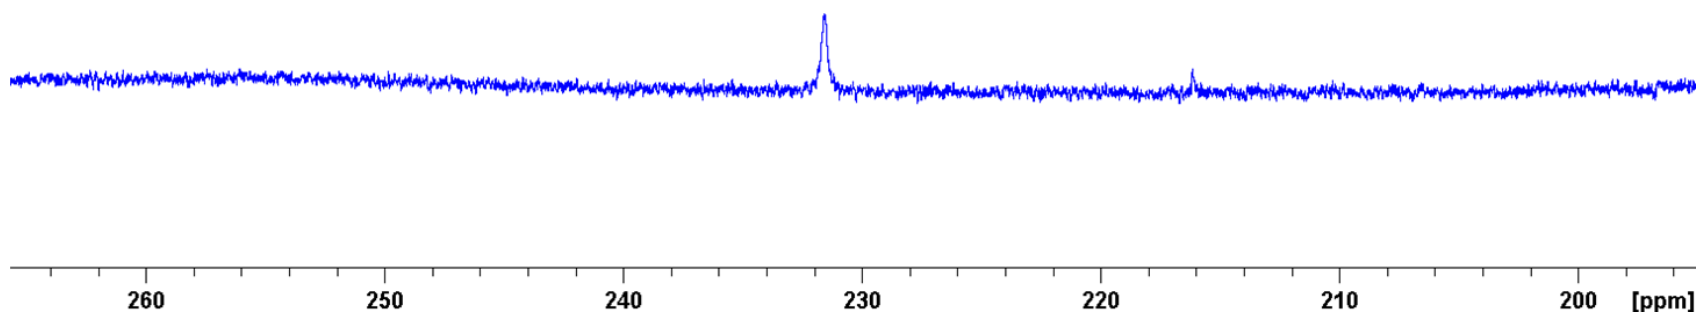

**Figure S7.**  $^{125}\text{Te}\{^1\text{H}\}$  NMR spectrum of [K(ATe<sub>2</sub><sup>Tripp2</sup>)(THF)] (**4-Te**) in C<sub>6</sub>D<sub>6</sub> (298 K).

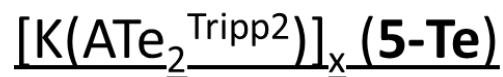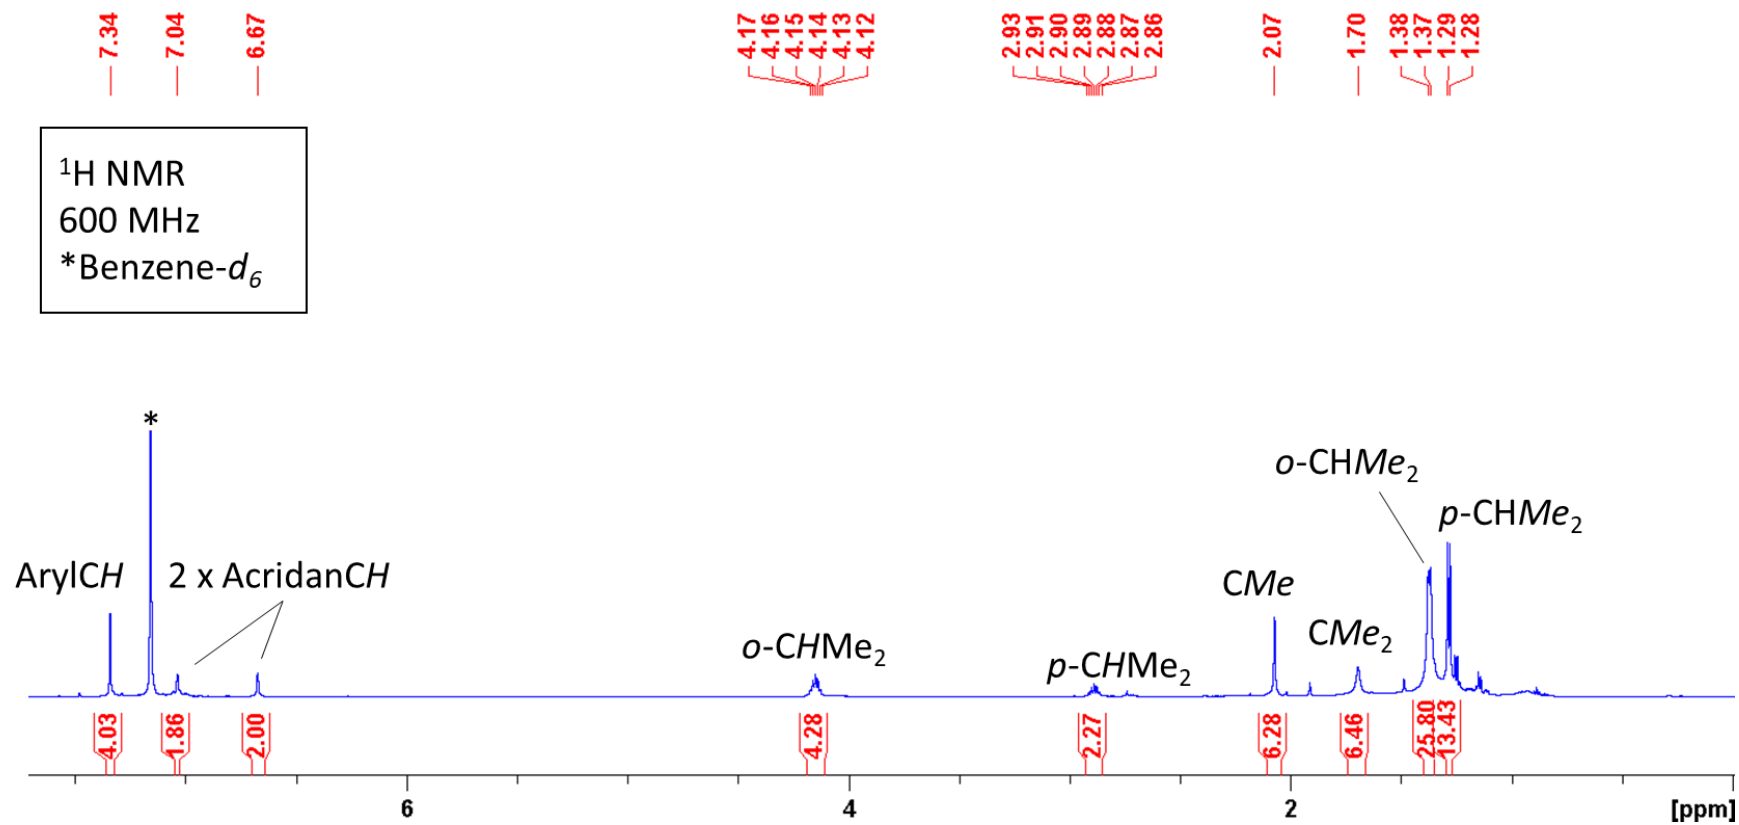

Figure S8.  $^1H$  NMR spectrum of  $[K(ATe_2^{Tripp2})]_x(5-Te)$  in  $C_6D_6$  (298 K).

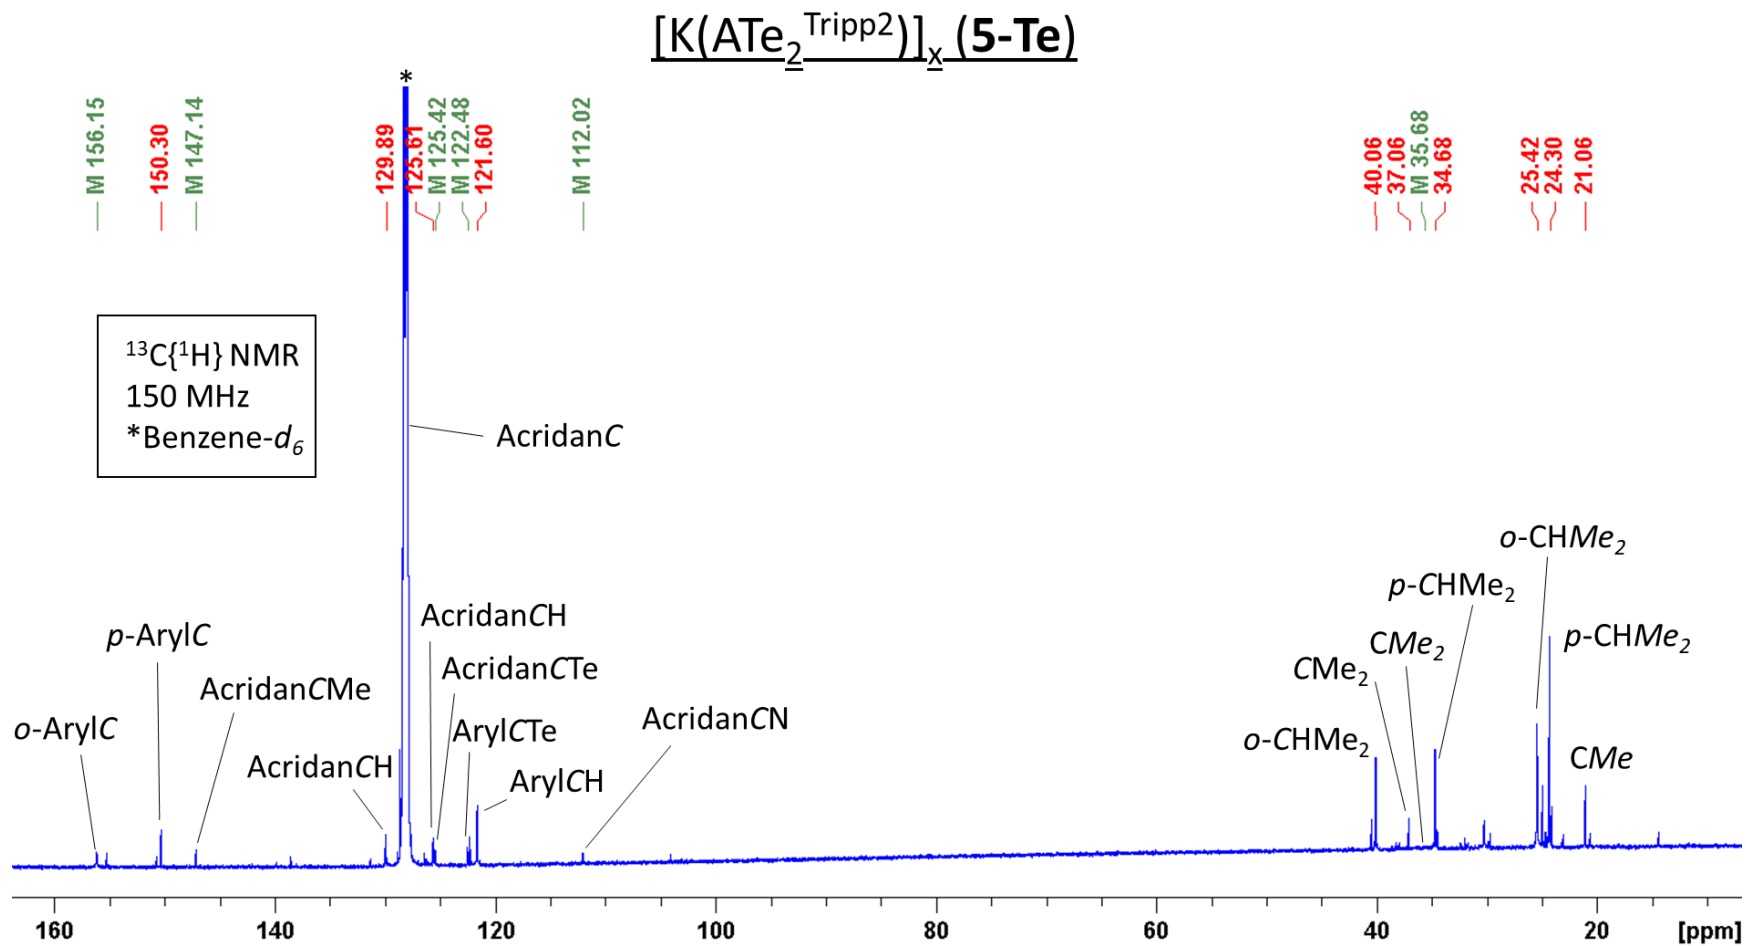

**Figure S9.**  $^{13}C\{^1H\}$  NMR spectrum of  $[K(ATe_2^{Tripp2})]_x (5-Te)$  in  $C_6D_6$  (298 K).

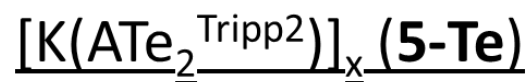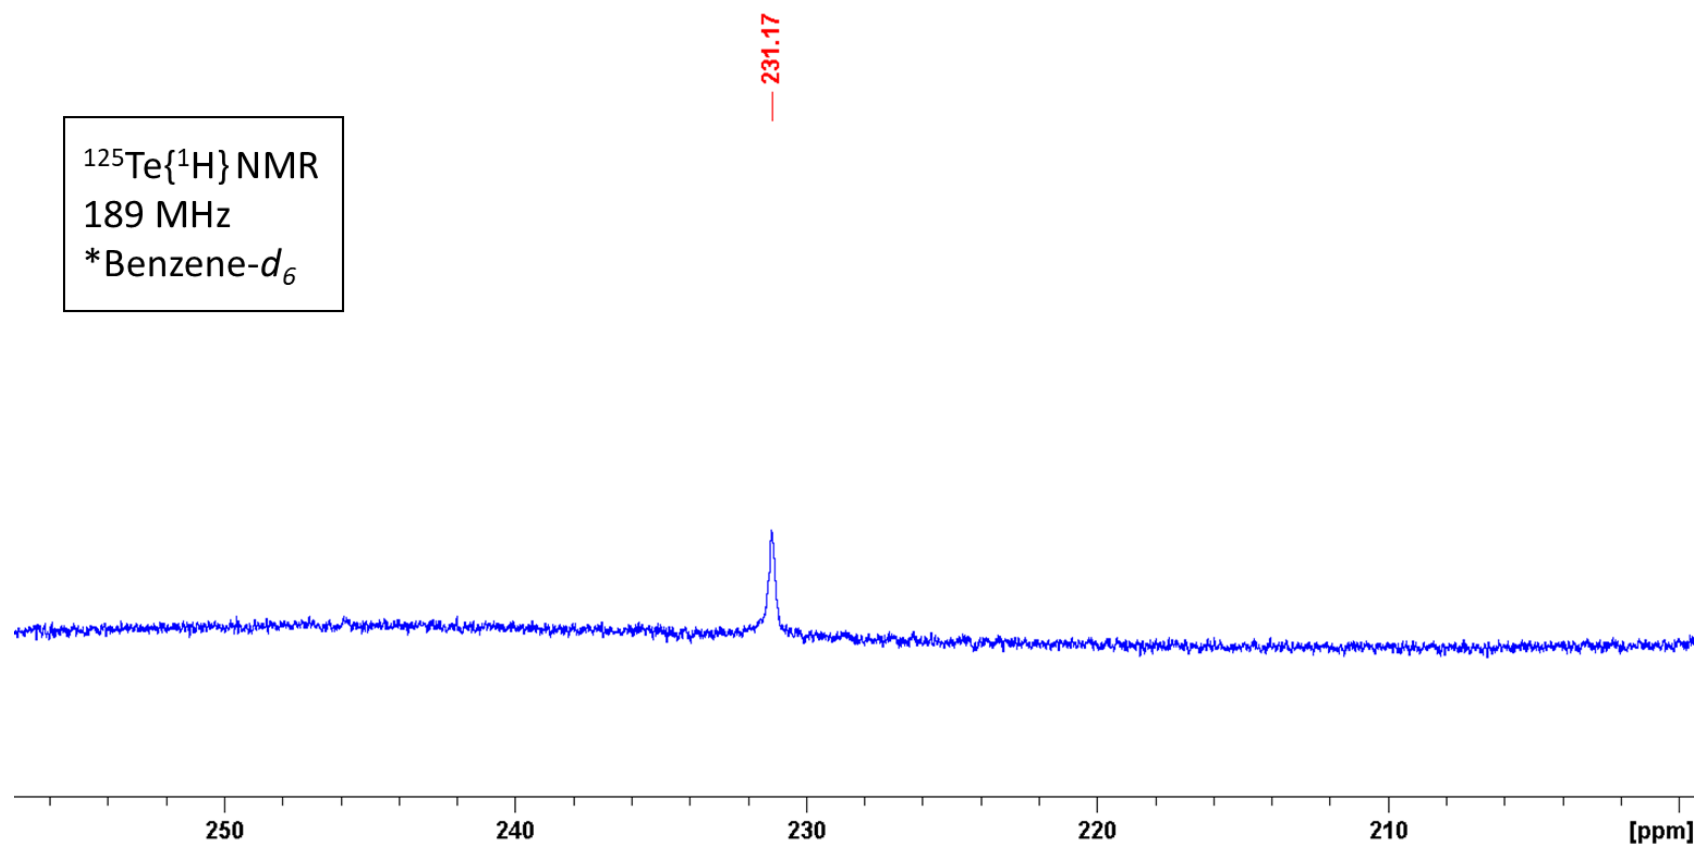

**Figure S10.**  $^{125}\text{Te}\{^1\text{H}\}$  NMR spectrum of  $[K(ATe_2^{Tripp2})]_x (5-Te)$  in  $C_6D_6$  (298 K).



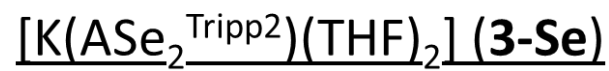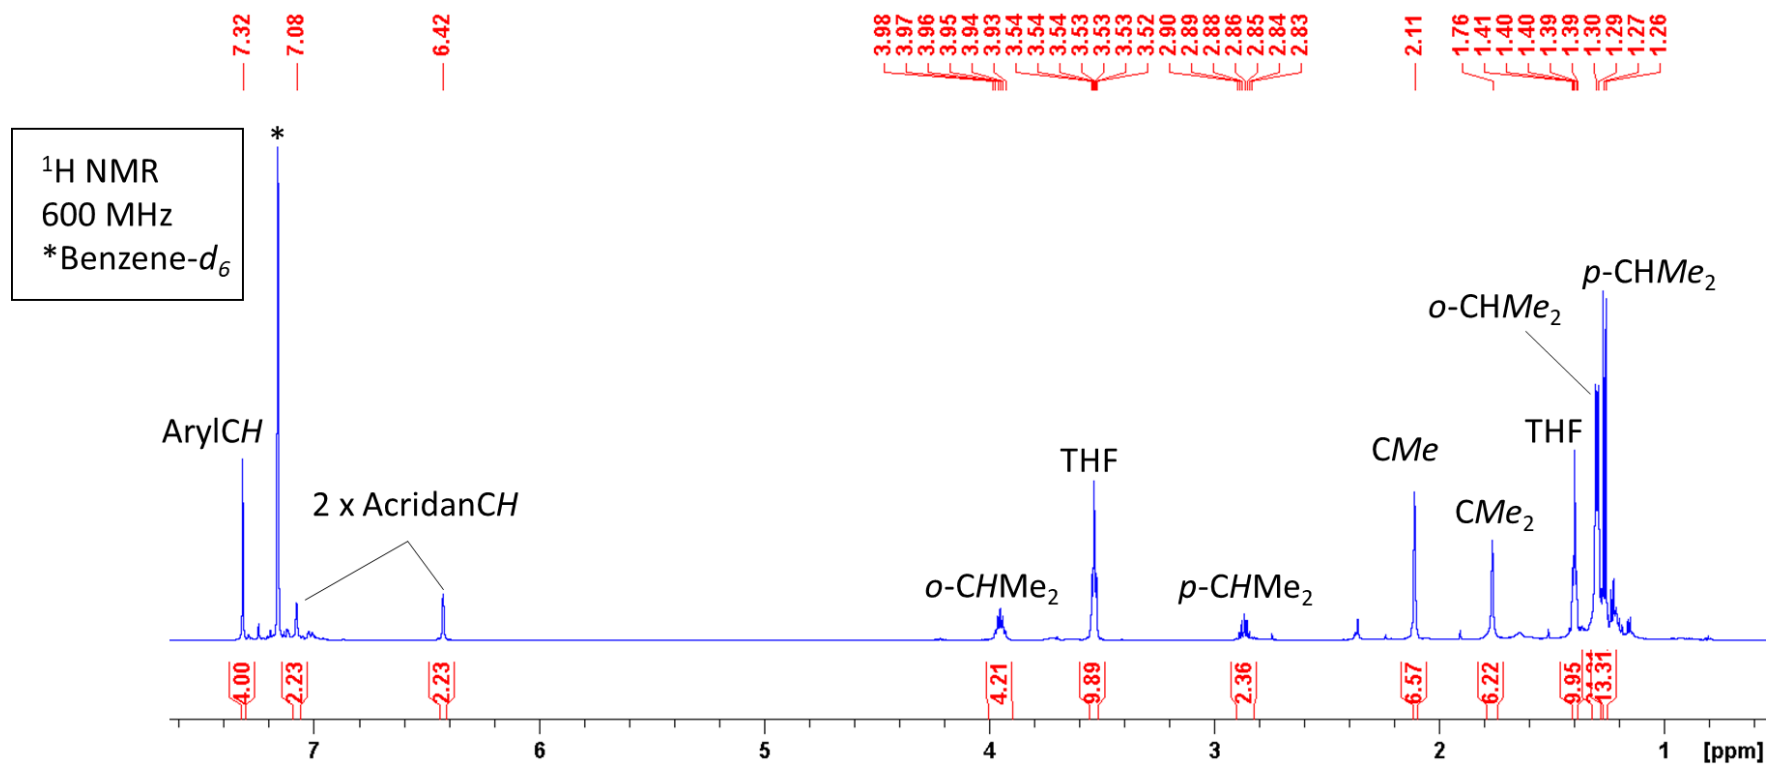

**Figure S11.**  $^1H$  NMR spectrum of  $[K(AsE_2^{Tripp2})(THF)_2]$  (**3-Se**) in  $C_6D_6$  (298 K).

$[K(AsE_2^{Tripp2})(THF)_2]$  (**3-Se**)

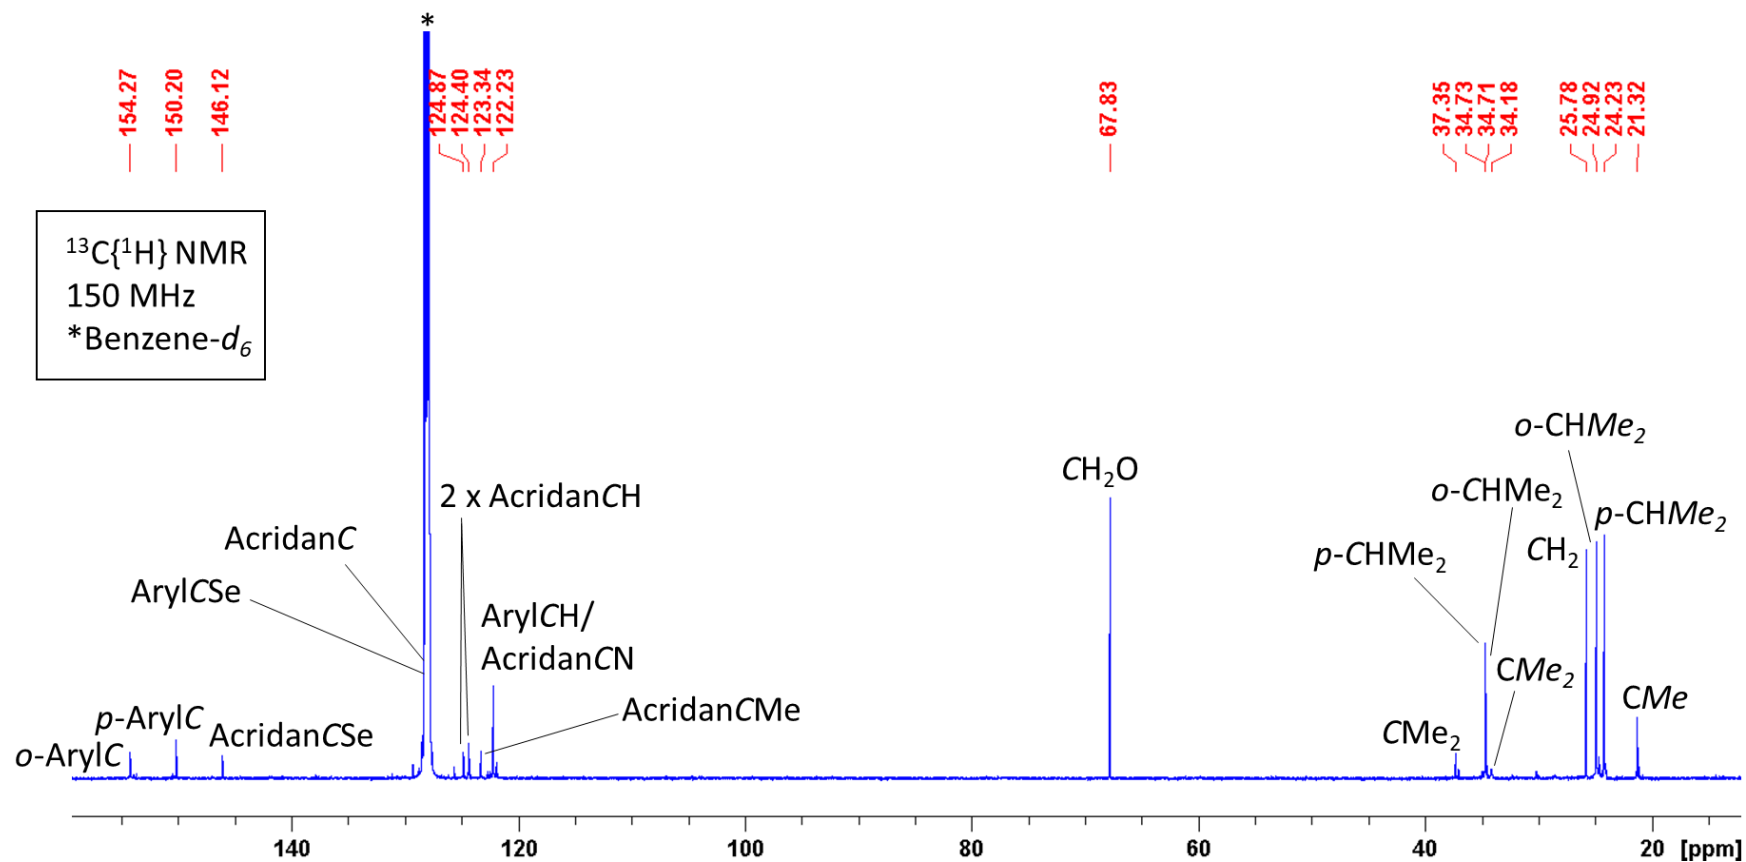

**Figure S12.**  $^{13}C\{^1H\}$  NMR spectrum of  $[K(AsE_2^{Tripp2})(THF)_2]$  (**3-Se**) in  $C_6D_6$  (298 K).

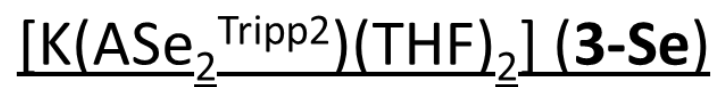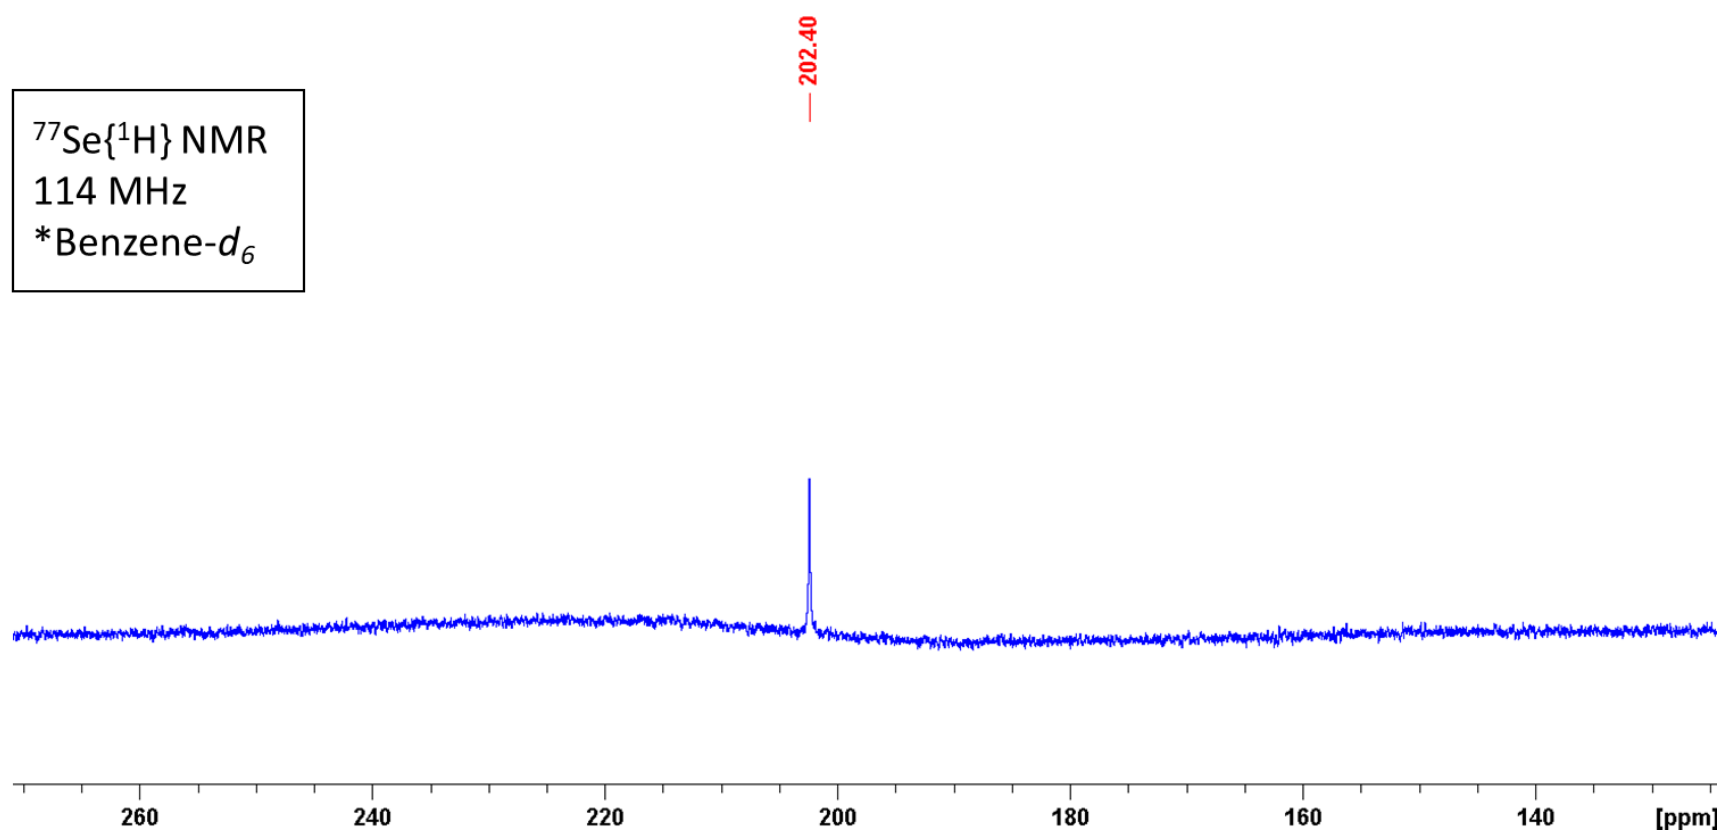

**Figure S13.**  $^{77}\text{Se}\{^1\text{H}\}$  NMR spectrum of  $[\text{K}(\text{ASe}_2^{\text{Tripp}2})(\text{THF})_2]$  (**3-Se**) in  $\text{C}_6\text{D}_6$  (298 K).

[K(ASe<sub>2</sub><sup>Tripp2</sup>)(THF)] (4-Se)

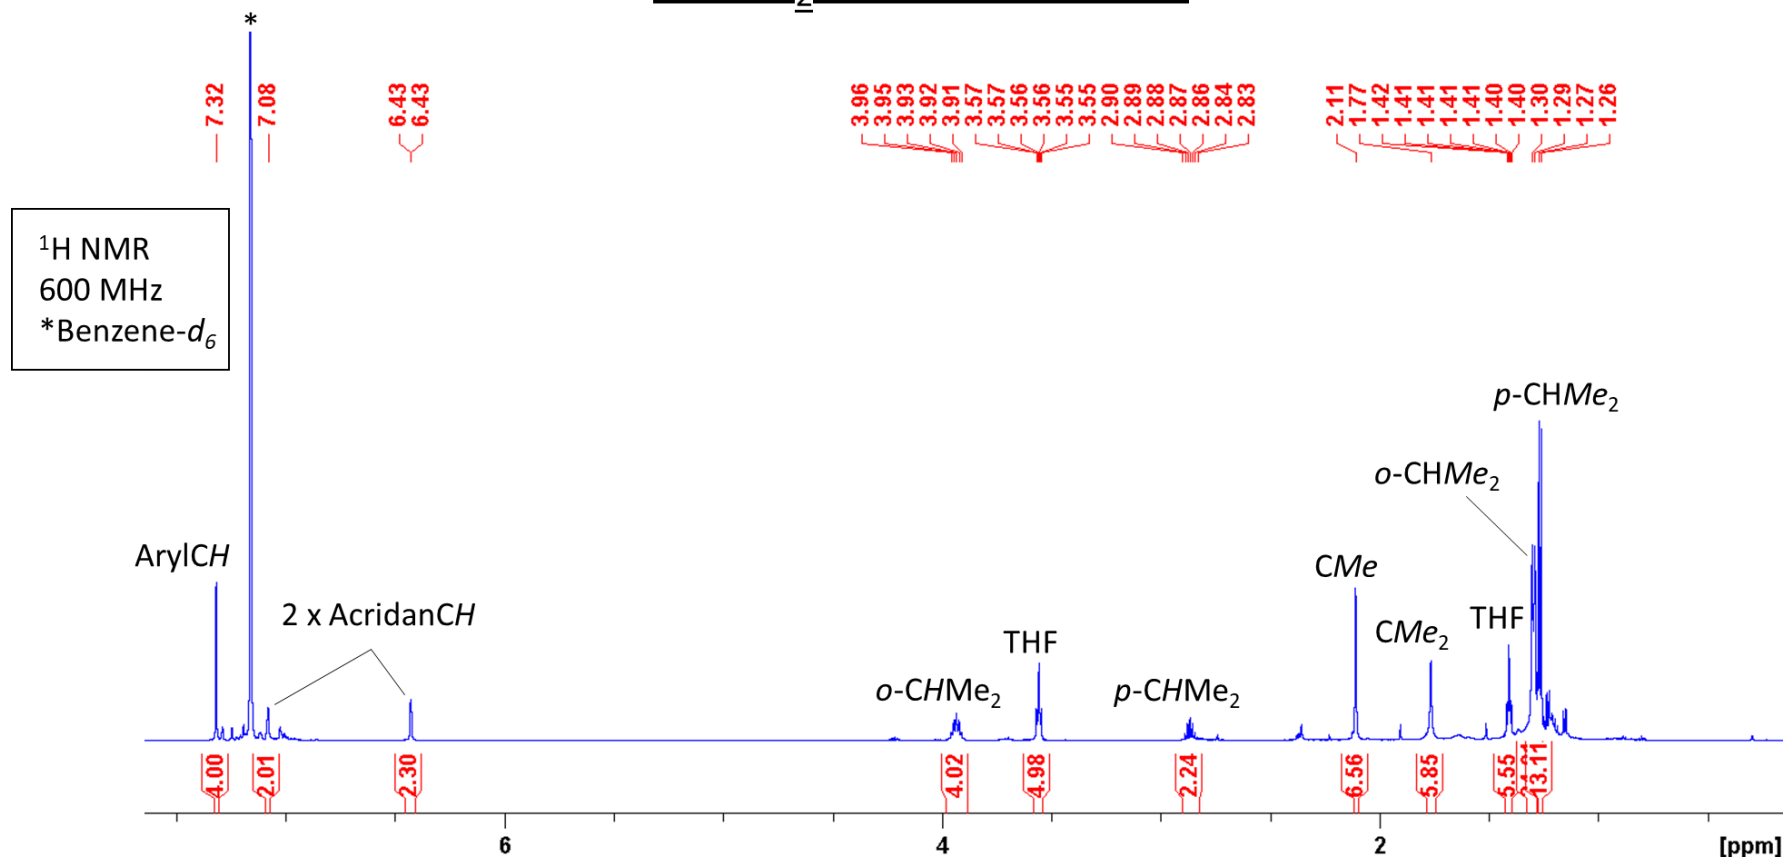

**Figure S14.** <sup>1</sup>H NMR spectrum of [K(ASe<sub>2</sub><sup>Tripp2</sup>)(THF)] (4-Se) in C<sub>6</sub>D<sub>6</sub> (298 K).

[K(ASe<sub>2</sub><sup>Tripp2</sup>)(THF)] (4-Se)

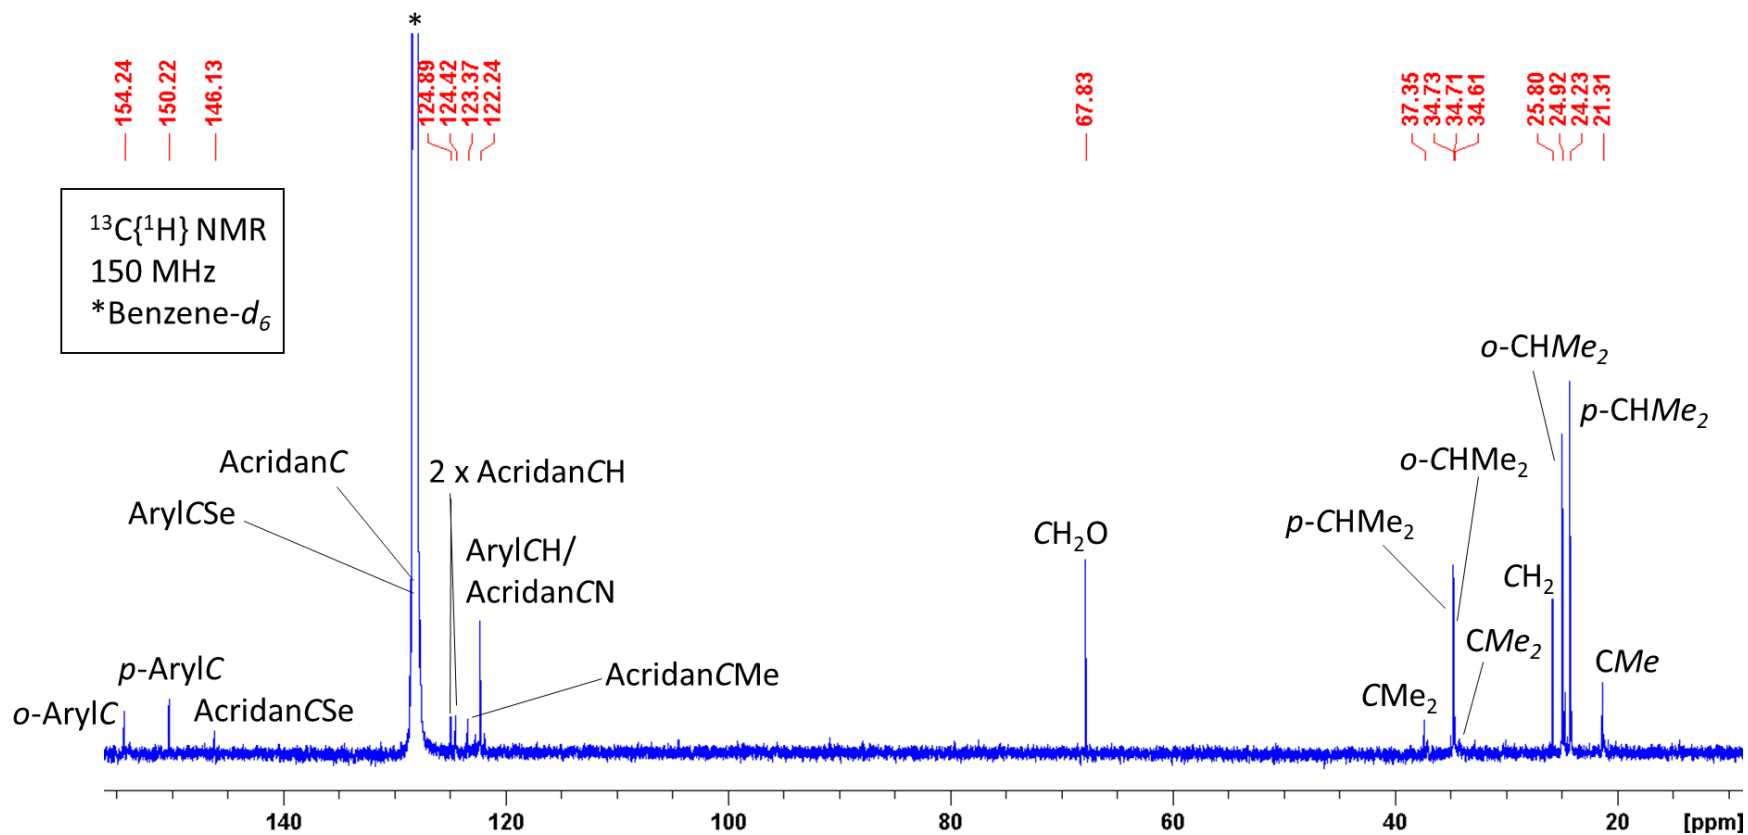

**Figure S15.** <sup>13</sup>C{<sup>1</sup>H} NMR spectrum of [K(ASe<sub>2</sub><sup>Tripp2</sup>)(THF)] (4-Se) in C<sub>6</sub>D<sub>6</sub> (298 K).

[K(ASe<sub>2</sub><sup>Tripp2</sup>)(THF)] (4-Se)

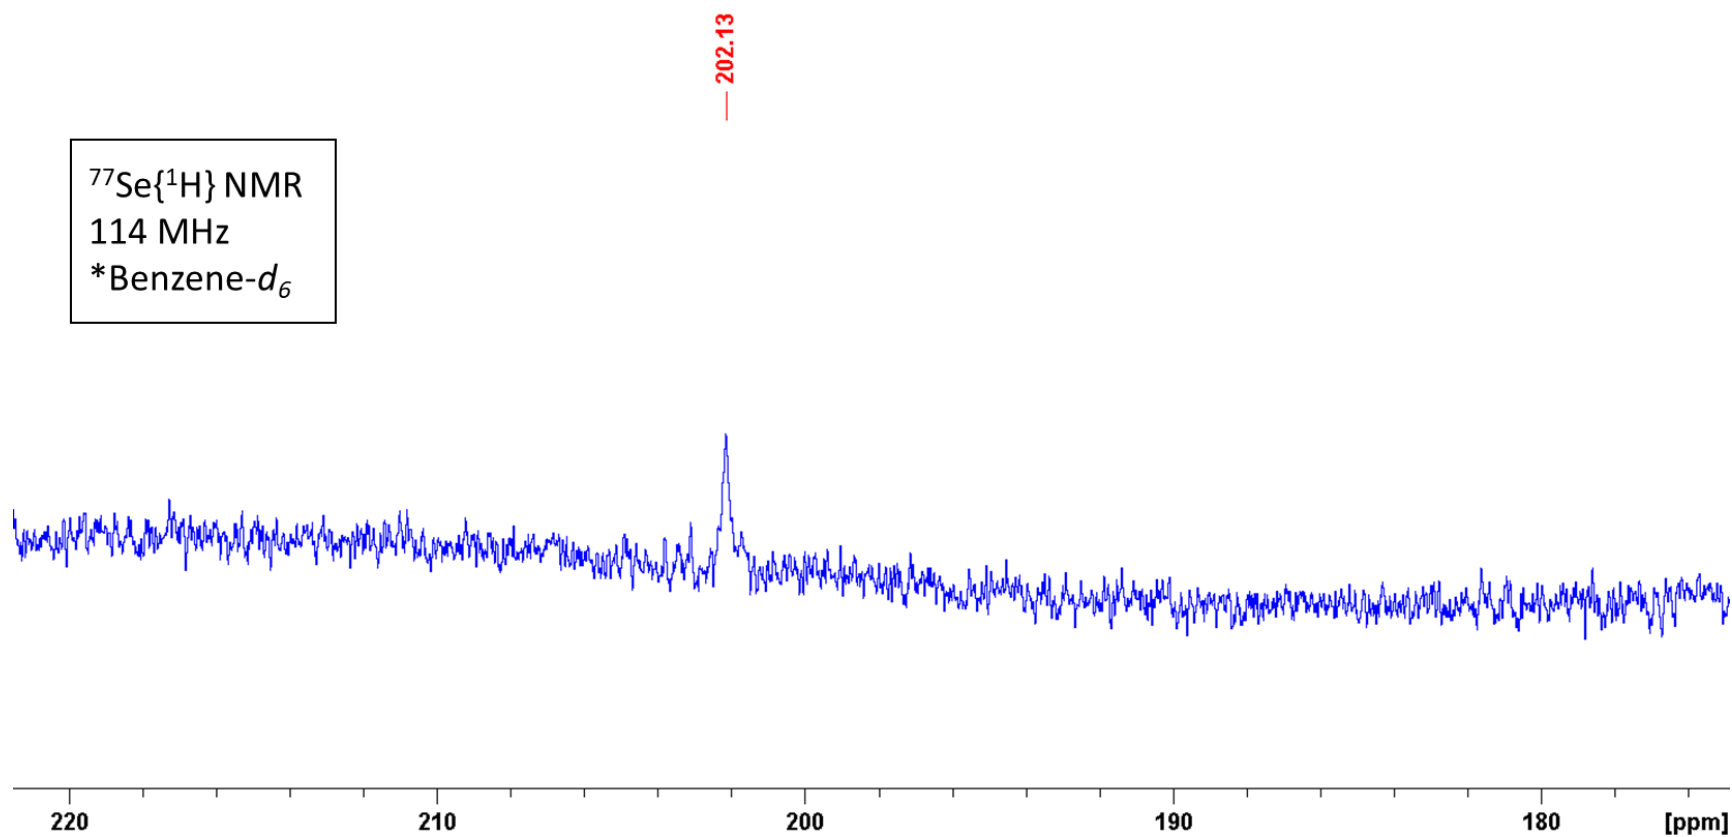

**Figure S16.** <sup>77</sup>Se{<sup>1</sup>H} NMR spectrum of [K(ASe<sub>2</sub><sup>Tripp2</sup>)(THF)] (4-Se) in C<sub>6</sub>D<sub>6</sub> (298 K).

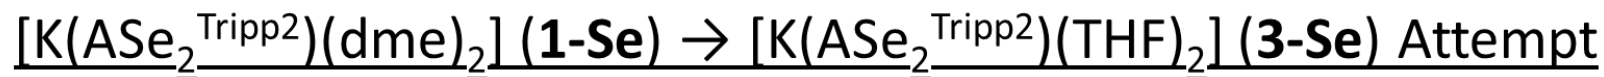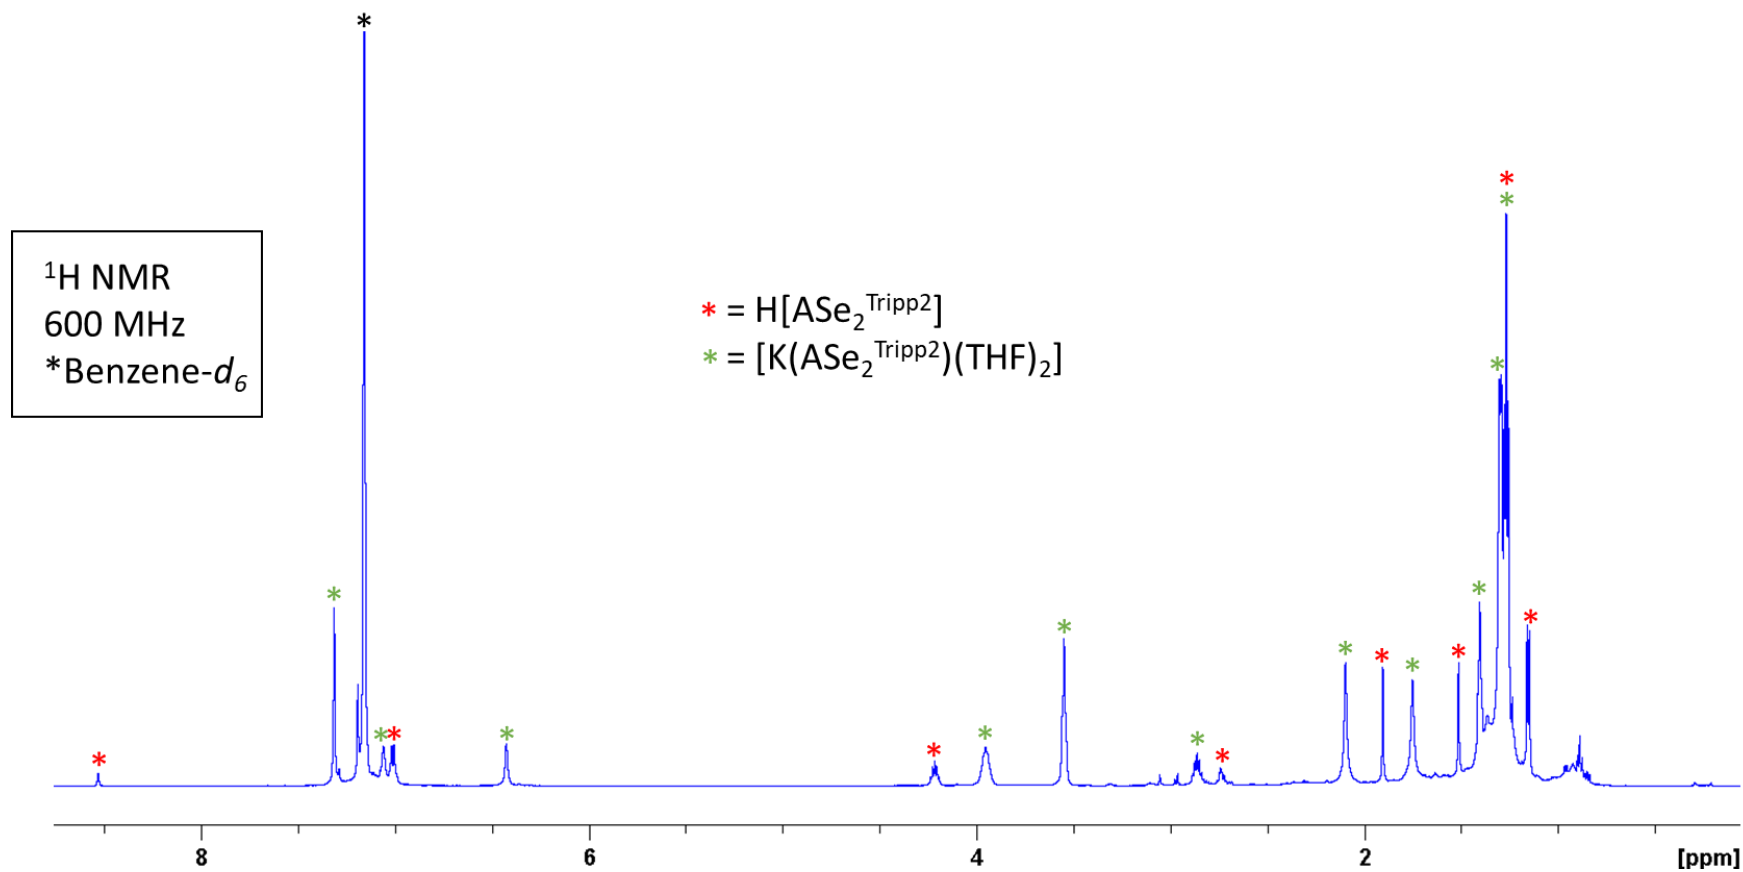

**Figure S17.**  $^1\text{H}$  NMR spectrum of  $[\text{K}(\text{ASe}_2^{\text{Tripp}2})(\text{THF})_2]$  (**3-Se**) and pro-ligand in  $\text{C}_6\text{D}_6$  (298 K) generated from repeated (three) dissolutions of  $[\text{K}(\text{ASe}_2^{\text{Tripp}2})(\text{dme})_2]$  (**1-Se**) in THF and evaporation of the solvent.

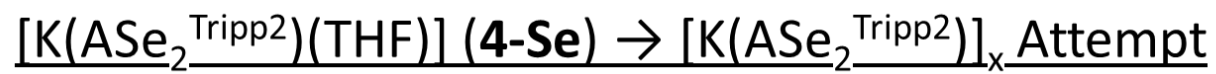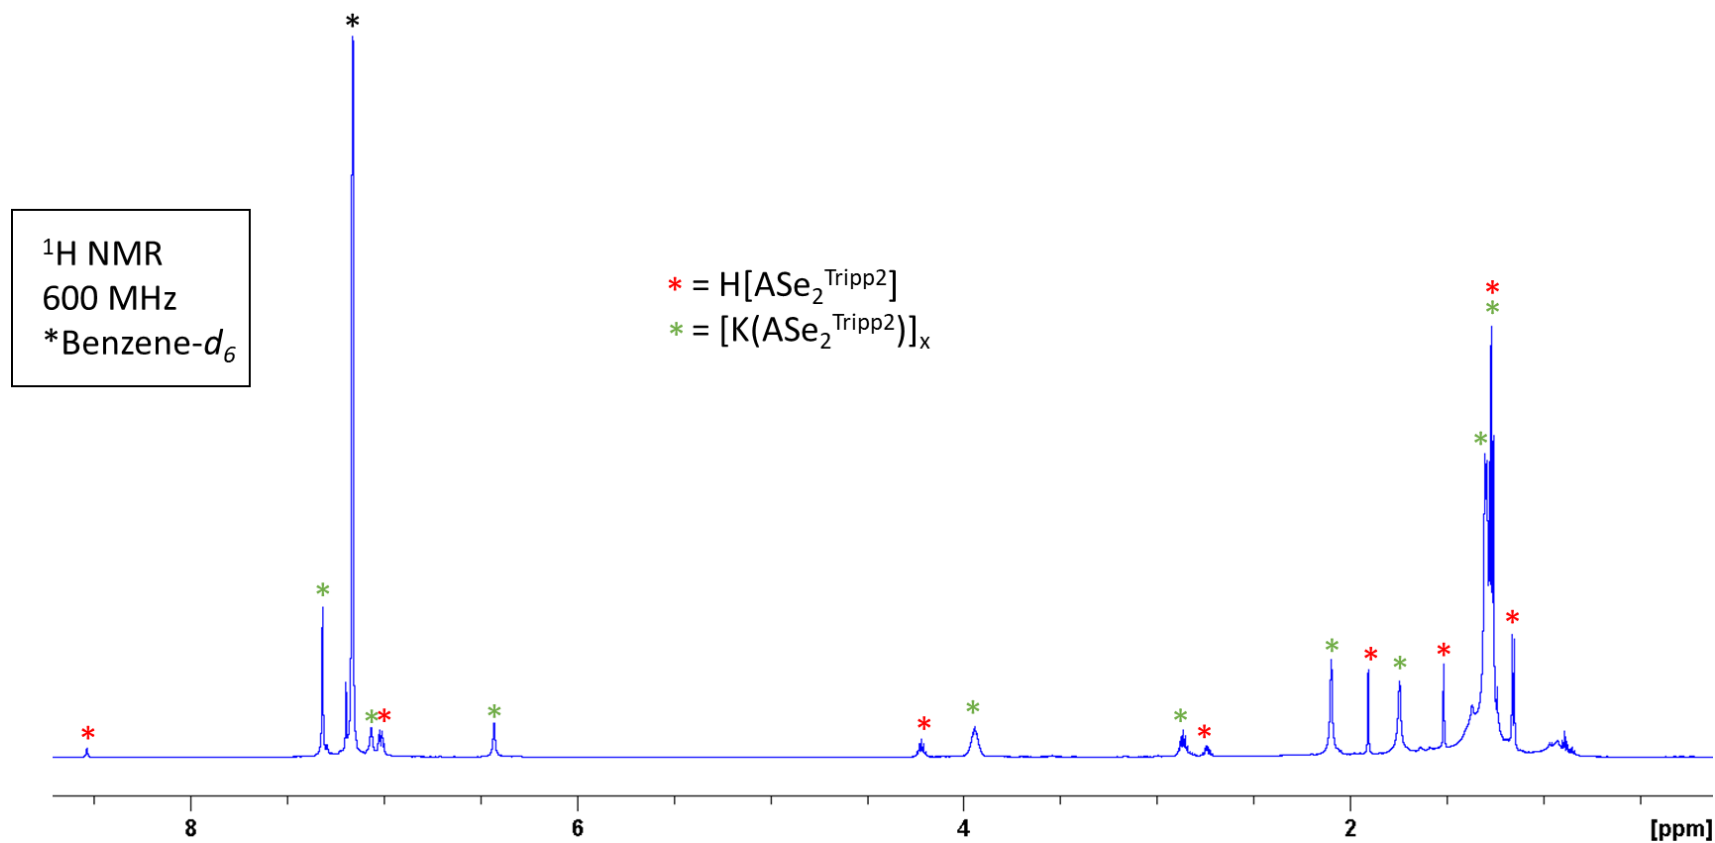

**Figure S18.**  $^1H$  NMR spectrum of  $[K(AsE_2^{Tripp2})]_x$  and pro-ligand in  $C_6D_6$  (298 K) generated from repeated (two) dissolutions of  $[K(AsE_2^{Tripp2})(THF)]$  (4-Se) in benzene and evaporation of the solvent.



## Computational Data

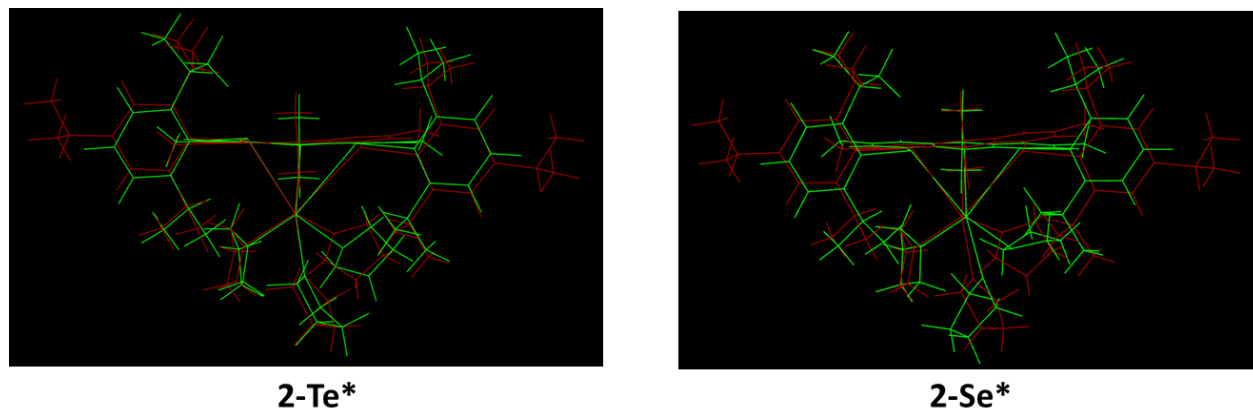

**Figure S19.** Overlay of the X-ray crystal structures (red)  $[\text{K}(\text{ATe}_2^{\text{Tripp}2})(\text{THF})_3]$  (**2-Te**) and  $[\text{K}(\text{ASe}_2^{\text{Tripp}2})(\text{THF})_3]$  (**2-Se**) and their respective DFT models (green)  $[\text{K}(\text{ATe}_2^{\text{Dipp}2})(\text{THF})_3]$  **2-Te\*** and  $[\text{K}(\text{ASe}_2^{\text{Dipp}2})(\text{THF})_3]$  **2-Se\***.

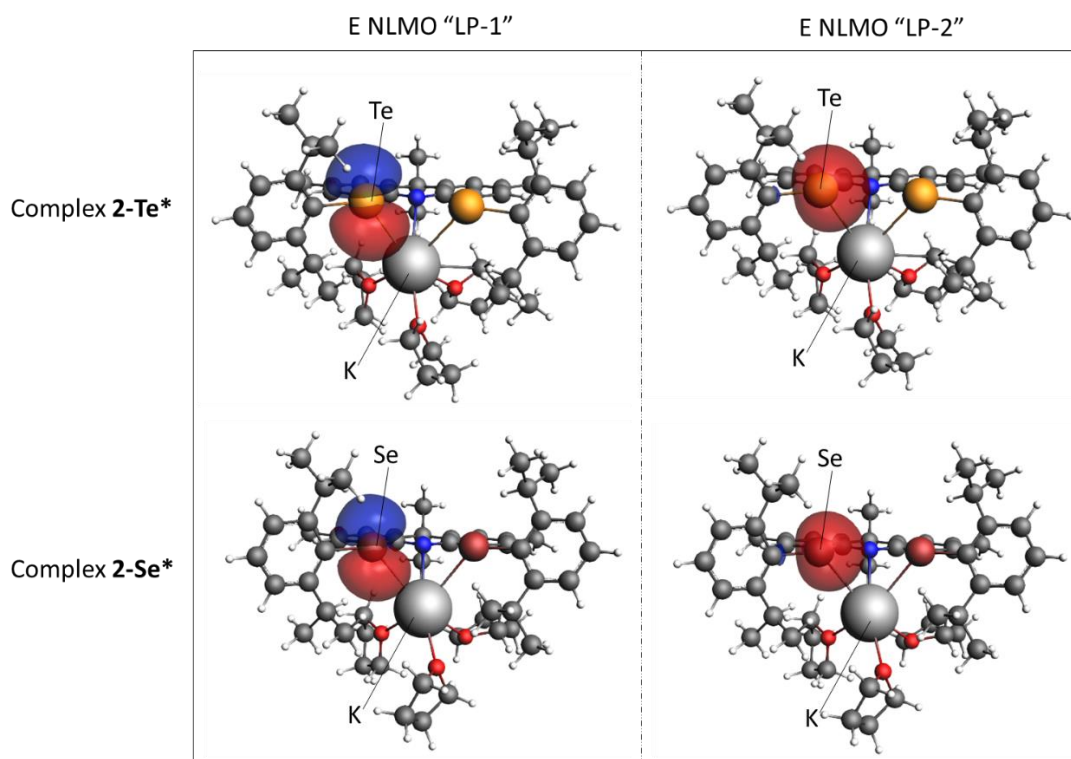

**Figure S20.** Representative E (Se or Te) NLMOs in calculated complexes **2-Te\*** and **2-Se\***. Isosurfaces are set to 0.03.

**Table S1.** Selected bond distances for the calculated structures **2-Te\*** and **2-Se\***. Values in un-bolded black font correspond to the calculated distances. X-ray structure metrics are reported in bold with curly brackets.

| DFT Complex                                                                  | K–E distances (Å)<br>(E = Se, Te)           | K–N distances (Å)          | K–O distances (Å)                                            |
|------------------------------------------------------------------------------|---------------------------------------------|----------------------------|--------------------------------------------------------------|
| [K(ATe <sub>2</sub> <sup>Dipp2</sup> )(THF) <sub>3</sub> ]<br><b>(2-Te*)</b> | 3.582, 3.640<br><b>{3.496(2), 3.639(2)}</b> | 2.840<br><b>{2.824(4)}</b> | 2.714, 2.736, 2.755<br><b>{2.584(5), 2.691(5), 2.693(5)}</b> |
| [K(ASe <sub>2</sub> <sup>Dipp2</sup> )(THF) <sub>3</sub> ]<br><b>(2-Se*)</b> | 3.426, 3.429<br><b>{3.397(4), 3.472(4)}</b> | 2.818<br><b>{2.82(1)}</b>  | 2.747, 2.783, 2.805<br><b>{2.67(1), 2.68(1), 2.79(1)}</b>    |

**Table S2.** Selected QTAIM, NBO and Mayer bond order data for the K–E interactions (E = Se, Te) in **2-Te\*** and **2-Se\***. The E lone pair NLMOs are denoted as “LP-1” and “LP-2” (see Figure S20). NLMOs have been normalized to include only metal and chalcogen contributions.

| DFT Complex                                                                  | K–E Mayer Bond Orders | $\delta$ K–E      | $H_b$ K–E (au)     | % K in E NLMO, “LP-1” (normalized) | % K in E NLMO, “LP-2” (normalized) |
|------------------------------------------------------------------------------|-----------------------|-------------------|--------------------|------------------------------------|------------------------------------|
| [K(ATe <sub>2</sub> <sup>Dipp2</sup> )(THF) <sub>3</sub> ]<br><b>(2-Te*)</b> | 0.08, 0.10            | 0.0678,<br>0.0736 | 0.00010,<br>0.0010 | 0.51%, 0.53%                       | 0.73%, 0.71%                       |
| [K(ASe <sub>2</sub> <sup>Dipp2</sup> )(THF) <sub>3</sub> ]<br><b>(2-Se*)</b> | 0.07, 0.08            | 0.0673<br>0.0671  | 0.0013,<br>0.0013  | 0.24%, 0.19%                       | 0.69%, 0.68%                       |

**Table S3.** Potassium and chalcogen (Se or Te) atomic orbital compositions in the E lone pair NLMO's (denoted as "LP-1" and "LP-2"; see Figure S20) for **2-Te\*** and **2-Se\***.

| DFT Complex                                                                  | E atomic orbital composition in "LP-1" (%)                                                   | E atomic orbital composition in "LP-2" (%)                                                | M atomic orbital composition in "LP-1" (%)                                                          | M atomic orbital composition in "LP-2" (%)                                                        |
|------------------------------------------------------------------------------|----------------------------------------------------------------------------------------------|-------------------------------------------------------------------------------------------|-----------------------------------------------------------------------------------------------------|---------------------------------------------------------------------------------------------------|
| [K(ATe <sub>2</sub> <sup>Dipp2</sup> )(THF) <sub>3</sub> ]<br><b>(2-Te*)</b> | <i>s</i> (0.37-0.67),<br><i>p</i> (99.28-99.58),<br><i>d</i> (0.04),<br><i>f</i> (0.01)      | <i>s</i> (78.21-78.38),<br><i>p</i> (21.60-21.77),<br><i>d</i> (0.01),<br><i>f</i> (0.00) | <i>s</i> (79.80-83.18),<br><i>p</i> (2.06-2.07),<br><i>d</i> (14.64-18.03),<br><i>f</i> (0.11)      | <i>s</i> (99.21-99.24),<br><i>p</i> (0.14-0.18),<br><i>d</i> (0.54-0.60),<br><i>f</i> (0.05)      |
| [K(ASe <sub>2</sub> <sup>Dipp2</sup> )(THF) <sub>3</sub> ]<br><b>(2-Se*)</b> | <i>s</i> (0.07-0.13),<br><i>p</i> (99.81-99.86),<br><i>d</i> (0.05-0.06),<br><i>f</i> (0.01) | <i>s</i> (74.54-74.56),<br><i>p</i> (25.41-25.43),<br><i>d</i> (0.02),<br><i>f</i> (0.00) | <i>s</i> (59.00-66.19),<br><i>p</i> (2.71-3.54),<br><i>d</i> (30.79-37.12),<br><i>f</i> (0.30-0.34) | <i>s</i> (98.13-98.55),<br><i>p</i> (0.26-0.32),<br><i>d</i> (1.13-1.48),<br><i>f</i> (0.07-0.08) |

**Table S4.** Selected QTAIM, NBO and Mayer bond order data for the K–X interactions (X = N or O) in **2-Te\***, **2-Te\*<sub>Constr</sub>** and **2-Se\***. The K–N and K–O NLMOs have been normalized to include only metal and donor atom contributions.

| DFT Complex                                                                  | K–N Mayer Bond Orders | K–O Mayer Bond Orders    | $\delta$ K–N | $\delta$ K–O                 | $H_b$ K–N (au) | $H_b$ K–O (au)               | % K in K–N NLMO (normalized) | % K in K–O NLMO (normalized) |
|------------------------------------------------------------------------------|-----------------------|--------------------------|--------------|------------------------------|----------------|------------------------------|------------------------------|------------------------------|
| [K(ATe <sub>2</sub> <sup>Dipp2</sup> )(THF) <sub>3</sub> ]<br><b>(2-Te*)</b> | <0.05                 | 0.05,<br>0.05,<br><0.05  | 0.0973       | 0.0923,<br>0.0944,<br>0.0954 | 0.0021         | 0.0031,<br>0.0033,<br>0.0035 | 0.13%                        | 0.23%,<br>0.23%,<br>0.24%    |
| [K(ASe <sub>2</sub> <sup>Dipp2</sup> )(THF) <sub>3</sub> ]<br><b>(2-Se*)</b> | <0.05                 | 0.05,<br><0.05,<br><0.05 | 0.102        | 0.0908,<br>0.0860,<br>0.0816 | 0.0021         | 0.0033,<br>0.0031,<br>0.0030 | 0.19%                        | 0.41%,<br>0.22%,<br>0.25%    |

## SHAPE Parameters

**Table S5.** Continuous shape measures (CSMs) of the 6-coordinate potassium coordination polyhedra in the X-ray crystal structures of **2-Te** and **2-Se**. The values in red indicate the closest polyhedron according to the CSM's, while the values in blue indicate the second closest polyhedron according to the CSMs.

| Polyhedron                          | Symmetry | CSM of 6-coordinate potassium coordination polyhedra |              |
|-------------------------------------|----------|------------------------------------------------------|--------------|
|                                     |          | <b>2-Te</b>                                          | <b>2-Se</b>  |
| hexagon (HP-6)                      | $D_{6h}$ | 25.288                                               | 23.176       |
| pentagonal pyramid (PPY-6)          | $C_{5v}$ | 23.401                                               | 20.586       |
| octahedron (OC-6)                   | $O_h$    | <b>7.268</b>                                         | <b>7.889</b> |
| trigonal prism (TPR-6)              | $D_{3h}$ | 13.249                                               | 12.028       |
| Johnson pentagonal pyramid (JPPY-6) | $C_{5v}$ | 25.701                                               | 22.818       |

**Table S6.** Continuous shape measures (CSMs) of the 5-coordinate potassium coordination polyhedra in the X-ray crystal structures of **5-Te** and **3-Se**. The values in red indicate the closest polyhedron according to the CSM's, while the values in blue indicate the second closest polyhedron according to the CSMs.

| Polyhedron                           | Symmetry | CSM of 5-coordinate potassium coordination polyhedral** |              |
|--------------------------------------|----------|---------------------------------------------------------|--------------|
|                                      |          | <b>5-Te</b>                                             | <b>3-Se</b>  |
| pentagon (PP-5)                      | $D_{5h}$ | 32.143                                                  | 29.840       |
| vacant octahedron (vOC-5)            | $C_{4v}$ | 15.913                                                  | 9.469        |
| trigonal bipyramid (TBPY-5)          | $D_{3h}$ | <b>15.736*</b>                                          | 10.892       |
| spherical square pyramid (SPY-5)     | $C_{4v}$ | 16.818                                                  | <b>9.218</b> |
| Johnson trigonal bipyramid (JTBPY-5) | $D_{3h}$ | 17.581                                                  | 14.277       |

\* The coordination geometry in **5-Te** is not a strong match to any regular polyhedron.

\*\* The coordination geometries of **5-Te** and **3-Se** match with multiple different polyhedra to a similar extent.

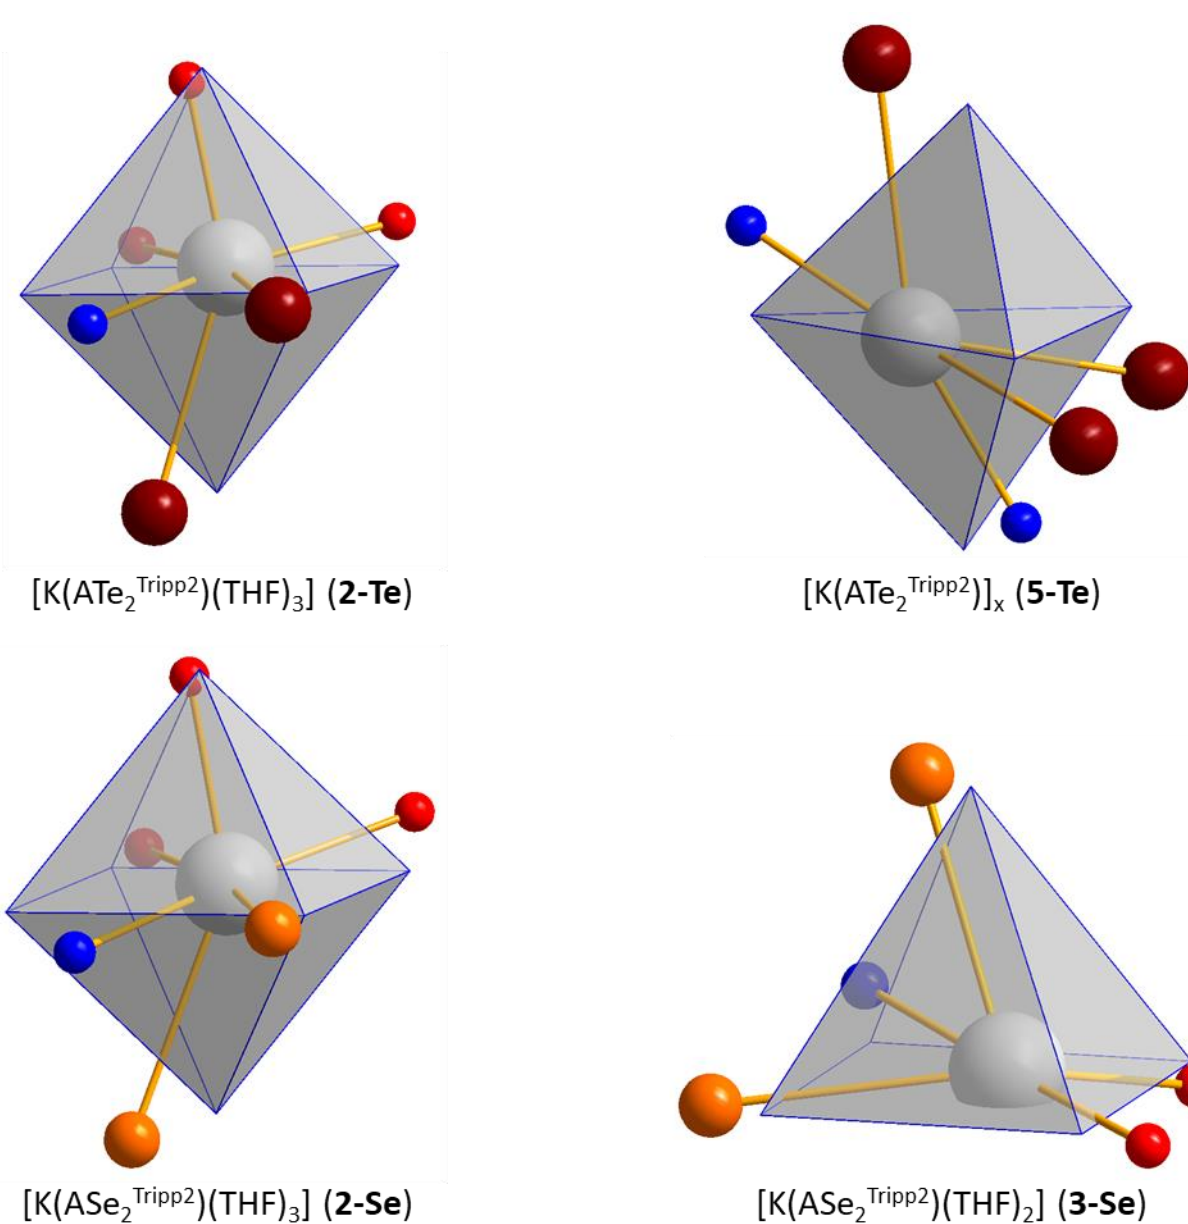

**Figure S21.** Closest fits, according to the SHAPE program, for the coordination geometry around potassium in the X-ray structures of  $[K(ATe_2^{Tripp2})(THF)_3]$  (**2-Te**; top left),  $[K(ATe_2^{Tripp2})(THF)_3]$  (**5-Te**; top right),  $[K(AsE_2^{Tripp2})(THF)_3]$  (**2-Se**; bottom left) and  $[K(AsE_2^{Tripp2})(THF)_2]$  (**3-Se**; bottom right). Idealized polyhedra which most closely match the geometry of each structure have been superimposed (**2-Te** and **2-Se**; octahedron, **5-Te**; trigonal bipyramid, **3-Se**; spherical square pyramid). Atoms in the coordination environment are represented by spheres; potassium (grey), nitrogen (blue), oxygen (red), selenium (orange), tellurium (burgundy).

## References:

- 1 P. J. Bailey, R. A. Coxall, C. M. Dick, S. Fabre, L. C. Henderson, C. Herber, S. T. Liddle, D. Loroño-González, A. Parkin and S. Parsons, *Chem. – Eur. J.*, 2003, **9**, 4820.
- 2 N. A. G. Gray, I. Vargas-Baca and D. J. H. Emslie, *Inorg. Chem.*, 2023, **62**, 16974.
- 3 R. K. Harris, E. D. Becker, S. M. Cabral de Menezes, R. Goodfellow and P. Granger, 2001, **73**, 1795.
- 4 G. M. Sheldrick, *Acta Crystallogr., Sect. A: Found. Adv.*, **2015**, *71*, 3–8.
- 5 G. M. Sheldrick, *Acta Crystallogr., Sect. C: Struct. Chem.*, **2015**, *71*, 3–8.
- 6 O. V. Dolomanov, L. J. Bourhis, R. J. Gildea, J. K. A. Howard, H. Puschmann, *J. Appl. Crystallogr.*, **2009**, *42*, 339–341.
- 7 (a) ADF 2020, SCM, Theoretical Chemistry, Vrije Universiteit, Amsterdam, The Netherlands, <http://www.scm.com>; (b) C. F. Guerra, J. G. Snijders, G. te Velde and E. J. Baerends, *Theor. Chem. Acc.*, **1998**, *99* (6), 391-403; (c) G. te Velde, F. M. Bickelhaupt, E. J. Baerends, C. Fonseca Guerra, S. J. A. Van Gisbergen, J. G. Snijders and T. Ziegler, *J. Comput. Chem.*, **2001**, *22* (9), 931-967
- 8 J. P. Perdew, K. Burke and M. Ernzerhof, *Phys. Rev. Lett.*, 1996, **77**, 3865.
- 9 E. v. Lenthe, E. J. Baerends and J. G. Snijders, *J. Chem. Phys.*, 1993, **99**, 4597.
- 10 E. van Lenthe, E. J. Baerends and J. G. Snijders, *J. Chem. Phys.*, 1994, **101**, 9783.
- 11 E. van Lenthe, A. Ehlers and E.-J. Baerends, *J. Chem. Phys.*, 1999, **110**, 8943.
- 12 E. van Lenthe, J. G. Snijders and E. J. Baerends, *J. Chem. Phys.*, 1996, **105**, 6505.
- 13 E. van Lenthe, R. van Leeuwen, E. J. Baerends and J. G. Snijders, *Int. J. Quantum Chem.*, 1996, **57**, 281.
- 14 S. Grimme, J. Antony, S. Ehrlich and H. Krieg, *J. Chem. Phys.*, 2010, **132**, 154104.
- 15 S. Grimme, S. Ehrlich and L. Goerigk, *J. Comput. Chem.*, 2011, **32**, 1456.
- 16 A. D. Becke, *J. Chem. Phys.*, 1988, **88**, 2547.
- 17 M. Franchini, P. H. T. Philipsen and L. Visscher, *J. Comput. Chem.*, 2013, **34**, 1819.
- 18 A. Bérces, R. M. Dickson, L. Fan, H. Jacobsen, D. Swerhone and T. Ziegler, *Comput. Phys. Commun.*, 1997, **100**, 247.
- 19 H. Jacobsen, A. Bérces, D. P. Swerhone and T. Ziegler, *Comput. Phys. Commun.*, 1997, **100**, 263.
- 20 S. K. Wolff, *Int. J. Quantum Chem.*, 2005, **104**, 645.
- 21 R. F. W. Bader, *Atoms in Molecules: A Quantum Theory*, Clarendon Press, Oxford, 1990.
- 22 J. I. Rodríguez, R. F. W. Bader, P. W. Ayers, C. Michel, A. W. Götz and C. Bo, *Chem. Phys. Lett.*, 2009, **472**, 149.
- 23 J. I. Rodríguez, A. M. Köster, P. W. Ayers, A. Santos-Valle, A. Vela and G. Merino, *J. Comput. Chem.*, 2009, **30**, 1082.
- 24 J. I. Rodríguez, *J. Comput. Chem.*, 2013, **34**, 681.
- 25 P. W. Ayers and S. Jenkins, *Comput. Theor. Chem.*, 2015, **1053**, 112.
- 26 V. Tognetti and L. Joubert, *Phys. Chem. Chem. Phys.*, 2014, **16**, 14539.
- 27 Y. A. Abramov, *Acta Crystallogr., Sect. A: Found. Crystallogr.*, **1997**, *A53*, 264-272.
- 28 X. Fradera, M. A. Austen and R. F. W. Bader, *J. Phys. Chem. A*, 1999, **103**, 304.
- 29 J. Poater, M. Solà, M. Duran and X. Fradera, *Theor. Chem. Acc.*, 2002, **107**, 362.
- 30 NBO 6.0: E. D. Glendening, J. K. Badenhoop, A. E. Reed, J. E. Carpenter, J. A. Bohmann, C. M. Morales, C. R. Landis, and F. Weinhold, Theoretical Chemistry Institute, University of Wisconsin, Madison, 2013.
